# Supplementary material for: Structures and infrared spectra of fluoride–hydrogen sulfide clusters from ab initio calculations: F–-(H2S)n, n= 1–5
Source: Royal Society of Chemistry journal article supplement (doi:10.1039/b510923j), 2005-01-01
Supplement: b510923j.pdf [file b510923j.pdf]

## Trimer Structures: $F^-(H_2S)_2$

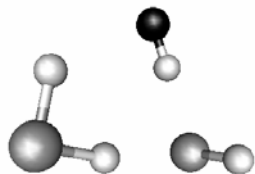

$C_1$  symmetry, minimum.

HF-SH<sup>-</sup> unit

|             | $r(H_b-F)$ | $r(S-H_b)$ | $r(S-H_t)$ | $\theta(S-H_b-F)$ | $\theta(H-S-H)$ | $zpe$ | $E_{MP2}$   | $E_{e/BSSE}$ | $\Delta E_{e/BSSE/Corr}$ |
|-------------|------------|------------|------------|-------------------|-----------------|-------|-------------|--------------|--------------------------|
| <i>pvdz</i> | 0.983      | 1.995      | 1.354      | 176.8             | 94.2            | 22.1  | -897.459371 | -897.454428  | 0.0                      |
| <i>pvtz</i> | 0.981      | 1.980      | 1.340      | 176.7             | 93.5            | 22.5  | -897.653025 | -897.649761  | 0.0                      |

SH<sub>2</sub> bound to F and S

|             | $r(H...F)$ | $r(H...S)$ | $r(S-H_F)$ | $r(S-H_S)$ | $\theta(H-S-H)$ |
|-------------|------------|------------|------------|------------|-----------------|
| <i>pvdz</i> | 2.763      | 2.246      | 1.351      | 1.394      | 90.8            |
| <i>pvtz</i> | 2.631      | 2.239      | 1.338      | 1.382      | 90.4            |

|                 | <i>MP2/aug-cc-pvtz</i> |
|-----------------|------------------------|
| $\omega_1 a$    | 2921 <b>2397</b>       |
| $\omega_2 a$    | 2767 <b>4</b>          |
| $\omega_3 a$    | 2744 <b>25</b>         |
| $\omega_4 a$    | 2214 <b>1709</b>       |
| $\omega_5 a$    | 1189 <b>37</b>         |
| $\omega_6 a$    | 954 <b>21</b>          |
| $\omega_7 a$    | 887 <b>52</b>          |
| $\omega_8 a$    | 599 <b>&lt;1</b>       |
| $\omega_9 a$    | 309 <b>15</b>          |
| $\omega_{10} a$ | 299 <b>5</b>           |
| $\omega_{11} a$ | 245 <b>27</b>          |
| $\omega_{12} a$ | 220 <b>9</b>           |
| $\omega_{13} a$ | 172 <b>10</b>          |
| $\omega_{14} a$ | 132 <b>35</b>          |
| $\omega_{15} a$ | 49 <b>1</b>            |

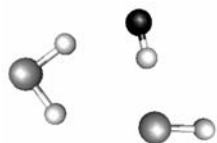

$C_s$  symmetry, 1 imaginary frequency ( $a''$ )

HF-SH unit

|             | $r(H_b-F)$ | $r(S-H_b)$ | $r(S-H_d)$ | $\theta(S-H_b-F)$ | $\theta(H-S-H)$ | $zpe$ | $E_{MP2}$   | $E_{e/BSSE}$ | $\Delta E_{e/BSSE/Corr}$ |
|-------------|------------|------------|------------|-------------------|-----------------|-------|-------------|--------------|--------------------------|
| <i>pvdz</i> | 1.004      | 1.920      | 1.352      | 173.9             | 98.2            | 21.8  | -897.454722 | -897.450330  | 2.3                      |
| <i>pvtz</i> | 0.997      | 1.921      | 1.339      | 174.1             | 97.5            | 22.1  | -897.648509 | -897.645473  | 2.3                      |

SH<sub>2</sub> bound to F and S

|             | $r(H...F)$ | $r(H...S)$ | $r(S-H_F)$ | $r(S-H_S)$ | $\theta(H-S-H)$ |
|-------------|------------|------------|------------|------------|-----------------|
| <i>pvdz</i> | 2.107      | 2.765      | 1.357      | 1.353      | 90.6            |
| <i>pvtz</i> | 2.134      | 2.665      | 1.344      | 1.341      | 90.5            |

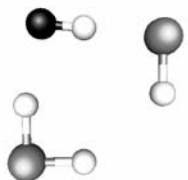

$C_s$  symmetry, 1 imaginary frequency ( $a''$ )

HF-SH unit

|             | $r(H_b-F)$ | $r(S-H_b)$ | $r(S-H_d)$ | $\theta(S-H_b-F)$ | $\theta(H-S-H)$ | $zpe$ | $E_{MP2}$   | $E_{e/BSSE}$ | $\Delta E_{e/BSSE/Corr}$ |
|-------------|------------|------------|------------|-------------------|-----------------|-------|-------------|--------------|--------------------------|
| <i>pvdz</i> | 1.019      | 1.877      | 1.354      | 178.4             | 95.4            | 21.5  | -897.453961 | -897.449466  | 2.5                      |
| <i>pvtz</i> | 1.009      | 1.884      | 1.340      | 178.8             | 95.6            | 21.9  | -897.647509 | -897.644450  | 2.7                      |

SH<sub>2</sub> bound to F

|             | $r(H...F)$ | $r(S-H_F)$ | $r(S-H_H)$ | $\theta(H-S-H)$ |
|-------------|------------|------------|------------|-----------------|
| <i>pvdz</i> | 1.918      | 1.364      | 1.350      | 91.4            |
| <i>pvtz</i> | 1.941      | 1.350      | 1.337      | 91.0            |

|                   | <i>MP2/aug-cc-pvtz</i> |
|-------------------|------------------------|
| $\omega_1 a'$     | 2747 <b>66</b>         |
| $\omega_2 a'$     | 2736 <b>354</b>        |
| $\omega_3 a'$     | 2722 <b>335</b>        |
| $\omega_4 a'$     | 2615 <b>2303</b>       |
| $\omega_5 a'$     | 1204 <b>12</b>         |
| $\omega_6 a'$     | 1049 <b>51</b>         |
| $\omega_7 a'$     | 308 <b>8</b>           |
| $\omega_8 a'$     | 272 <b>17</b>          |
| $\omega_9 a'$     | 181 <b>24</b>          |
| $\omega_{10} a'$  | 118 <b>17</b>          |
| $\omega_{11} a'$  | 58 <b>5</b>            |
| $\omega_{12} a''$ | 890 <b>16</b>          |
| $\omega_{13} a''$ | 348 <b>4</b>           |
| $\omega_{14} a''$ | 199 <b>1</b>           |
| $\omega_{15} a''$ | 207i <b>15</b>         |

|                   | <i>MP2/aug-cc-pvtz</i> |
|-------------------|------------------------|
| $\omega_1 a'$     | 2774 <b>8</b>          |
| $\omega_2 a'$     | 2737 <b>48</b>         |
| $\omega_3 a'$     | 2646 <b>494</b>        |
| $\omega_4 a'$     | 2411 <b>3120</b>       |
| $\omega_5 a'$     | 1214 <b>7</b>          |
| $\omega_6 a'$     | 1080 <b>40</b>         |
| $\omega_7 a'$     | 354 <b>17</b>          |
| $\omega_8 a'$     | 291 <b>28</b>          |
| $\omega_9 a'$     | 176 <b>22</b>          |
| $\omega_{10} a'$  | 133 <b>21</b>          |
| $\omega_{11} a'$  | 45 <b>3</b>            |
| $\omega_{12} a''$ | 913 <b>15</b>          |
| $\omega_{13} a''$ | 411 <b>6</b>           |
| $\omega_{14} a''$ | 130 <b>5</b>           |
| $\omega_{15} a''$ | 159i <b>&lt;1</b>      |

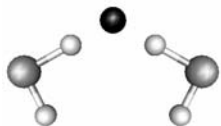

$C_{2v}$  symmetry, 2 imaginary frequencies ( $a_2$ ,  $b_2$ )

|             | $r(F-H_b)$ | $r(S-H_b)$ | $r(S-H_l)$ | $\theta(F-H_b-S)$ | $\theta(H-S-H)$ | $\theta(H_b-F-H_b)$ | $zpe$ | $E_{MP2}$   | $E_e/BSSE$  | $\Delta E_e/BSSE/Corr$ |
|-------------|------------|------------|------------|-------------------|-----------------|---------------------|-------|-------------|-------------|------------------------|
| <i>pvdz</i> | 1.389      | 1.476      | 1.350      | 179.2             | 93.4            | 114.5               | 19.4  | -897.449915 | -897.444198 | 3.7                    |
| <i>pvtz</i> | 1.355      | 1.477      | 1.337      | 179.0             | 93.2            | 118.8               | 19.1  | -897.641292 | -897.637592 | 4.3                    |

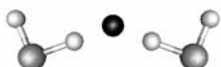

$C_{2v}$  symmetry, 3 imaginary frequencies ( $a_2$ ,  $b_1$ ,  $b_2$ )

|             | $r(F-H_b)$ | $r(S-H_b)$ | $r(S-H_l)$ | $\theta(F-H_b-S)$ | $\theta(H-S-H)$ | $\theta(H_b-F-H_b)$ | $zpe$ | $E_{MP2}$   | $E_e/BSSE$  | $\Delta E_e/BSSE/Corr$ |
|-------------|------------|------------|------------|-------------------|-----------------|---------------------|-------|-------------|-------------|------------------------|
| <i>pvdz</i> | 1.394      | 1.472      | 1.350      | 178.4             | 93.5            | 130.9               | 19.3  | -897.449284 | -897.443759 | 3.9                    |
| <i>pvtz</i> | 1.365      | 1.471      | 1.337      | 178.4             | 93.3            | 136.6               | 19.1  | -897.640741 | -897.637125 | 4.6                    |

|                   | <i>MP2/aug-cc-pvtz</i> |
|-------------------|------------------------|
| $\omega_1 a_1$    | 2770 <b>13</b>         |
| $\omega_2 a_1$    | 1578 <b>1222</b>       |
| $\omega_3 a_1$    | 1274 <b>20</b>         |
| $\omega_4 a_1$    | 453 <b>29</b>          |
| $\omega_5 a_1$    | 294 <b>36</b>          |
| $\omega_6 a_1$    | 22 < <b>1</b>          |
| $\omega_7 a_2$    | 856 <b>0</b>           |
| $\omega_8 a_2$    | 73i <b>0</b>           |
| $\omega_9 b_1$    | 856 <b>12</b>          |
| $\omega_{10} b_1$ | 42 <b>11</b>           |
| $\omega_{11} b_2$ | 2770 <b>4</b>          |
| $\omega_{12} b_2$ | 1233 <b>14</b>         |
| $\omega_{13} b_2$ | 814 <b>3151</b>        |
| $\omega_{14} b_2$ | 418 <b>7</b>           |
| $\omega_{15} b_2$ | 544i <b>5032</b>       |

|                   | <i>MP2/aug-cc-pvtz</i> |
|-------------------|------------------------|
| $\omega_1 a_1$    | 2772 <b>16</b>         |
| $\omega_2 a_1$    | 1626 <b>370</b>        |
| $\omega_3 a_1$    | 1254 <b>2</b>          |
| $\omega_4 a_1$    | 441 <b>10</b>          |
| $\omega_5 a_1$    | 247 <b>10</b>          |
| $\omega_6 a_1$    | 24 < <b>1</b>          |
| $\omega_7 a_2$    | 854 <b>0</b>           |
| $\omega_8 a_2$    | 47i <b>0</b>           |
| $\omega_9 b_1$    | 831 <b>13</b>          |
| $\omega_{10} b_1$ | 24i <b>16</b>          |
| $\omega_{11} b_2$ | 2772 <b>3</b>          |
| $\omega_{12} b_2$ | 1242 <b>115</b>        |
| $\omega_{13} b_2$ | 877 <b>4627</b>        |
| $\omega_{14} b_2$ | 422 <b>34</b>          |
| $\omega_{15} b_2$ | 512i <b>5987</b>       |

## Tetramer Structures: F<sup>-</sup>-(H<sub>2</sub>S)<sub>3</sub>

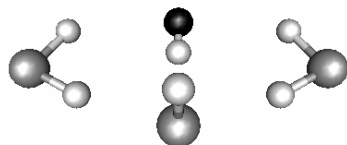

C<sub>s</sub> symmetry, minimum

HF-SH<sup>-</sup> unit

|             | $r(\text{F-H}_b)$ | $r(\text{S-H}_b)$ | $r(\text{S-H})$ | $\theta(\text{F-H}_b\text{-S})$ | $\theta(\text{H-S-H})$ | $zpe$ | $E_{MP2}$    | $E_{e/BSSE}$ | $\Delta E_{e/BSSE}$ | $\Delta E_{e/BSSE/Corr}$ |
|-------------|-------------------|-------------------|-----------------|---------------------------------|------------------------|-------|--------------|--------------|---------------------|--------------------------|
| <i>pvdz</i> | 0.982             | 1.994             | 1.354           | 179.6                           | 93.6                   | 33.0  | -1296.329537 | -1296.322323 | 0.0                 | 0.0                      |
| <i>pvtz</i> | 0.980             | 1.978             | 1.340           | 179.8                           | 92.8                   | 33.4  | -1296.578488 | -1296.574028 | 0.0                 | 0.0                      |

SH<sub>2</sub> bound to F and S

|             | $r(\text{H}\dots\text{F})$ | $r(\text{H}\dots\text{S})$ | $r(\text{S-H}_F)$ | $r(\text{S-H}_S)$ | $\theta(\text{H-S-H})$ |
|-------------|----------------------------|----------------------------|-------------------|-------------------|------------------------|
| <i>pvdz</i> | 2.690                      | 2.341                      | 1.351             | 1.380             | 90.8                   |
| <i>pvtz</i> | 2.587                      | 2.330                      | 1.338             | 1.368             | 90.5                   |

|                   | <i>MP2/aug-cc-pvtz</i> |
|-------------------|------------------------|
| $\omega_1 a'$     | 2927 <b>2006</b>       |
| $\omega_2 a'$     | 2767 <b>4</b>          |
| $\omega_3 a'$     | 2746 <b>14</b>         |
| $\omega_4 a'$     | 2399 <b>170</b>        |
| $\omega_5 a'$     | 1193 <b>20</b>         |
| $\omega_6 a'$     | 935 <b>16</b>          |
| $\omega_7 a'$     | 514 <b>2</b>           |
| $\omega_8 a'$     | 315 <b>17</b>          |
| $\omega_9 a'$     | 273 <b>1</b>           |
| $\omega_{10} a'$  | 238 <b>8</b>           |
| $\omega_{11} a'$  | 210 <b>11</b>          |
| $\omega_{12} a'$  | 101 <b>3</b>           |
| $\omega_{13} a'$  | 36 <b>1</b>            |
| $\omega_{14} a'$  | 18 <b>1</b>            |
| $\omega_{15} a''$ | 2768 <b>6</b>          |
| $\omega_{16} a''$ | 2361 <b>2204</b>       |
| $\omega_{17} a''$ | 1197 <b>26</b>         |
| $\omega_{18} a''$ | 907 <b>79</b>          |
| $\omega_{19} a''$ | 547 <b>&lt;1</b>       |
| $\omega_{20} a''$ | 268 <b>5</b>           |
| $\omega_{21} a''$ | 242 <b>28</b>          |
| $\omega_{22} a''$ | 185 <b>8</b>           |
| $\omega_{23} a''$ | 138 <b>56</b>          |
| $\omega_{24} a''$ | 65 <b>&lt;1</b>        |

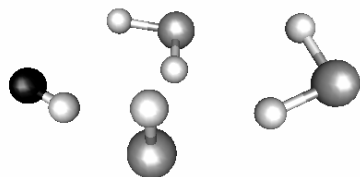

$C_1$  symmetry, minimum

HF-SH<sup>-</sup> unit

|             | $r(\text{F-H}_b)$ | $r(\text{S-H}_b)$ | $r(\text{S-H}_l)$ | $\theta(\text{F-H}_b\text{-S})$ | $\theta(\text{H-S-H})$ | $zpe$ | $E_{\text{MP2}}$ | $E_{e/\text{BSSE}}$ | $\Delta E_{e/\text{BSSE}}$ | $\Delta E_{e/\text{BSSE}/\text{Corr}}$ |
|-------------|-------------------|-------------------|-------------------|---------------------------------|------------------------|-------|------------------|---------------------|----------------------------|----------------------------------------|
| <i>pvdz</i> | 0.976             | 2.024             | 1.354             | 177.0                           | 92.0                   | 33.1  | -1296.329437     | -1296.321831        | 0.3                        | 0.4                                    |
| <i>pvtz</i> | 0.973             | 2.009             | 1.340             | 177.1                           | 91.7                   | 33.4  | -1296.578410     | -1296.573807        | 0.1                        | 0.1                                    |

SH<sub>2</sub> bound to F and S

|             | $r(\text{H}\dots\text{F})$ | $r(\text{H}\dots\text{S})$ | $r(\text{S-H}_F)$ | $r(\text{S-H}_S)$ | $\theta(\text{H-S-H})$ |
|-------------|----------------------------|----------------------------|-------------------|-------------------|------------------------|
| <i>pvdz</i> | 2.690                      | 2.321                      | 1.351             | 1.382             | 90.8                   |
| <i>pvtz</i> | 2.636                      | 2.299                      | 1.338             | 1.371             | 90.7                   |

SH<sub>2</sub> bound to SH<sup>-</sup> and SH<sub>2</sub> only

|             | $r(\text{H}\dots\text{S})$ | $r(\text{H}\dots\text{SH}_2)$ | $r(\text{S-H}_S)$ | $r(\text{S-H}_l)$ | $\theta(\text{H-S-H})$ |
|-------------|----------------------------|-------------------------------|-------------------|-------------------|------------------------|
| <i>pvdz</i> | 2.306                      | 3.008                         | 1.384             | 1.351             | 92.0                   |
| <i>pvtz</i> | 2.288                      | 2.967                         | 1.372             | 1.338             | 91.8                   |

|                 | <i>MP2/aug-cc-pvtz</i> |
|-----------------|------------------------|
| $\omega_1 a$    | 3061 <b>2192</b>       |
| $\omega_2 a$    | 2767 <b>2</b>          |
| $\omega_3 a$    | 2763 <b>1</b>          |
| $\omega_4 a$    | 2745 <b>12</b>         |
| $\omega_5 a$    | 2360 <b>1636</b>       |
| $\omega_6 a$    | 2294 <b>855</b>        |
| $\omega_7 a$    | 1211 <b>5</b>          |
| $\omega_8 a$    | 1192 <b>16</b>         |
| $\omega_9 a$    | 914 <b>27</b>          |
| $\omega_{10} a$ | 854 <b>42</b>          |
| $\omega_{11} a$ | 567 <b>2</b>           |
| $\omega_{12} a$ | 535 <b>1</b>           |
| $\omega_{13} a$ | 320 <b>16</b>          |
| $\omega_{14} a$ | 305 <b>2</b>           |
| $\omega_{15} a$ | 302 <b>8</b>           |
| $\omega_{16} a$ | 239 <b>24</b>          |
| $\omega_{17} a$ | 230 <b>25</b>          |
| $\omega_{18} a$ | 195 <b>6</b>           |
| $\omega_{19} a$ | 165 <b>7</b>           |
| $\omega_{20} a$ | 144 <b>38</b>          |
| $\omega_{21} a$ | 99 <b>10</b>           |
| $\omega_{22} a$ | 56 <b>2</b>            |
| $\omega_{23} a$ | 53 <b>1</b>            |
| $\omega_{24} a$ | 23 <b>&lt;1</b>        |

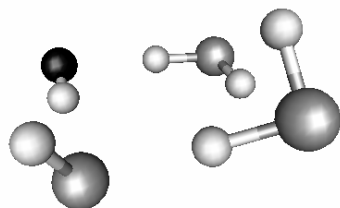

$C_1$  symmetry, minimum

HF-SH unit

|             | $r(F-H_b)$ | $r(S-H_b)$ | $r(S-H_f)$ | $\theta(F-H_b-S)$ | $\theta(H-S-H)$ | $zpe$ | $E_{MP2}$    | $E_{e/BSSE}$ | $\Delta E_{e/BSSE}$ | $\Delta E_{e/BSSE/Corr}$ |
|-------------|------------|------------|------------|-------------------|-----------------|-------|--------------|--------------|---------------------|--------------------------|
| <i>pvdz</i> | 0.995      | 1.943      | 1.353      | 176.7             | 95.9            | 32.9  | -1296.327756 | -1296.320285 | 1.3                 | 1.2                      |
| <i>pvtz</i> | 0.988      | 1.940      | 1.339      | 176.5             | 95.3            | 33.2  | -1296.576599 | -1296.571875 | 1.4                 | 1.2                      |

SH<sub>2</sub> bound to F and S

|             | $r(H...F)$ | $r(H...S)$ | $r(S-H_F)$ | $r(S-H_S)$ | $\theta(H-S-H)$ |
|-------------|------------|------------|------------|------------|-----------------|
| <i>pvdz</i> | 2.049      | 2.723      | 1.358      | 1.355      | 92.5            |
| <i>pvtz</i> | 2.056      | 2.725      | 1.345      | 1.342      | 92.4            |

SH<sub>2</sub> bound to S only

|             | $r(H...S)$ | $r(S-H_S)$ | $r(S-H_f)$ | $\theta(H-S-H)$ |
|-------------|------------|------------|------------|-----------------|
| <i>pvdz</i> | 2.156      | 1.410      | 1.350      | 92.5            |
| <i>pvtz</i> | 2.140      | 1.399      | 1.337      | 92.2            |

|                 | <i>MP2/aug-cc-pvtz</i> |
|-----------------|------------------------|
| $\omega_1 a$    | 2813 <b>2286</b>       |
| $\omega_2 a$    | 2272 <b>2</b>          |
| $\omega_3 a$    | 2746 <b>34</b>         |
| $\omega_4 a$    | 2712 <b>33</b>         |
| $\omega_5 a$    | 2669 <b>553</b>        |
| $\omega_6 a$    | 2005 <b>2555</b>       |
| $\omega_7 a$    | 1216 <b>1</b>          |
| $\omega_8 a$    | 1197 <b>8</b>          |
| $\omega_9 a$    | 988 <b>29</b>          |
| $\omega_{10} a$ | 898 <b>28</b>          |
| $\omega_{11} a$ | 664 <b>4</b>           |
| $\omega_{12} a$ | 370 <b>6</b>           |
| $\omega_{13} a$ | 339 <b>7</b>           |
| $\omega_{14} a$ | 329 <b>2</b>           |
| $\omega_{15} a$ | 318 <b>8</b>           |
| $\omega_{16} a$ | 265 <b>14</b>          |
| $\omega_{17} a$ | 225 <b>16</b>          |
| $\omega_{18} a$ | 215 <b>16</b>          |
| $\omega_{19} a$ | 146 <b>59</b>          |
| $\omega_{20} a$ | 124 <b>28</b>          |
| $\omega_{21} a$ | 104 <b>2</b>           |
| $\omega_{22} a$ | 72 <b>3</b>            |
| $\omega_{23} a$ | 24 <b>1</b>            |
| $\omega_{24} a$ | 16 <b>&lt;1</b>        |

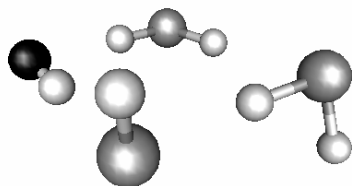

$C_1$  symmetry, minimum

HF-SH unit

|             | $r(F-H_b)$ | $r(S-H_b)$ | $r(S-H_d)$ | $\theta(F-H_b-S)$ | $\theta(H-S-H)$ | $zpe$ | $E_{MP2}$    | $E_{e/BSSE}$ | $\Delta E_{e/BSSE}$ | $\Delta E_{e/BSSE/Corr}$ |
|-------------|------------|------------|------------|-------------------|-----------------|-------|--------------|--------------|---------------------|--------------------------|
| <i>pvdz</i> | 0.992      | 1.949      | 1.353      | 177.2             | 96.2            | 32.9  | -1296.327421 | -1296.319956 | 1.5                 | 1.4                      |
| <i>pvtz</i> | 0.986      | 1.946      | 1.339      | 176.7             | 95.8            | 33.1  | -1296.576163 | -1296.571458 | 1.6                 | 1.3                      |

SH<sub>2</sub> bound to F and SH<sub>2</sub>

|             | $r(H...F)$ | $r(H...SH_2)$ | $r(S-H_F)$ | $r(S-H_{SH_2})$ | $\theta(H-S-H)$ |
|-------------|------------|---------------|------------|-----------------|-----------------|
| <i>pvdz</i> | 2.059      | 2.680         | 1.358      | 1.356           | 92.6            |
| <i>pvtz</i> | 2.072      | 2.678         | 1.345      | 1.343           | 92.6            |

SH<sub>2</sub> bound to S only

|             | $r(H...S)$ | $r(S-H_s)$ | $r(S-H_t)$ | $\theta(H-S-H)$ |
|-------------|------------|------------|------------|-----------------|
| <i>pvdz</i> | 2.155      | 1.411      | 1.350      | 92.2            |
| <i>pvtz</i> | 2.134      | 1.401      | 1.337      | 91.9            |

|                 | <i>MP2/aug-cc-pvtz</i> |
|-----------------|------------------------|
| $\omega_1 a$    | 2841 <b>2403</b>       |
| $\omega_2 a$    | 2774 <b>1</b>          |
| $\omega_3 a$    | 2747 <b>26</b>         |
| $\omega_4 a$    | 2701 <b>46</b>         |
| $\omega_5 a$    | 2679 <b>456</b>        |
| $\omega_6 a$    | 1982 <b>2696</b>       |
| $\omega_7 a$    | 1217 <b>3</b>          |
| $\omega_8 a$    | 1205 <b>9</b>          |
| $\omega_9 a$    | 975 <b>25</b>          |
| $\omega_{10} a$ | 899 <b>28</b>          |
| $\omega_{11} a$ | 643 <b>5</b>           |
| $\omega_{12} a$ | 367 <b>9</b>           |
| $\omega_{13} a$ | 356 <b>1</b>           |
| $\omega_{14} a$ | 331 <b>1</b>           |
| $\omega_{15} a$ | 309 <b>11</b>          |
| $\omega_{16} a$ | 264 <b>9</b>           |
| $\omega_{17} a$ | 234 <b>22</b>          |
| $\omega_{18} a$ | 200 <b>18</b>          |
| $\omega_{19} a$ | 145 <b>64</b>          |
| $\omega_{20} a$ | 112 <b>7</b>           |
| $\omega_{21} a$ | 81 <b>6</b>            |
| $\omega_{22} a$ | 73 <b>1</b>            |
| $\omega_{23} a$ | 27 <b>1</b>            |
| $\omega_{24} a$ | 13 <b>1</b>            |

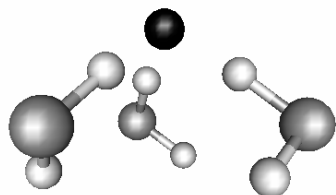

$C_3$  symmetry, minimum

|             | $r(F-H_b)$ | $r(S-H_b)$ | $r(S-H_d)$ | $\theta(F-H_b-S)$ | $\theta(H-S-H)$ | $\theta(H_b-F-H_b)$ | $zpe$ | $E_{MP2}$    | $E_{e/BSSE}$ | $\Delta E_{e/BSSE}$ | $\Delta E_{e/BSSE/Corr}$ |
|-------------|------------|------------|------------|-------------------|-----------------|---------------------|-------|--------------|--------------|---------------------|--------------------------|
| <i>pvdz</i> | 1.575      | 1.411      | 1.351      | 174.5             | 91.7            | 94.9                | 32.0  | -1296.323346 | -1296.315493 | 4.3                 | 3.3                      |
| <i>pvtz</i> | 1.571      | 1.400      | 1.338      | 174.0             | 91.5            | 94.5                | 31.9  | -1296.569060 | -1296.564323 | 6.0                 | 4.6                      |

|                 | <i>MP2/aug-cc-pvtz</i>  |
|-----------------|-------------------------|
| $\omega_1 a$    | 2767 <1                 |
| $\omega_2 a$    | 2220 <b>880</b>         |
| $\omega_3 a$    | 1233 <b>4</b>           |
| $\omega_4 a$    | 711 <b>6</b>            |
| $\omega_5 a$    | 378 <b>19</b>           |
| $\omega_6 a$    | 268 <b>44</b>           |
| $\omega_7 a$    | 222 <b>4</b>            |
| $\omega_8 a$    | 39 <1                   |
| $\omega_9 e$    | 2768 <b>1 (2)</b>       |
| $\omega_{10} e$ | 1874 <b>1920 (3840)</b> |
| $\omega_{11} e$ | 1233 <b>33 (66)</b>     |
| $\omega_{12} e$ | 720 <b>30 (60)</b>      |
| $\omega_{13} e$ | 366 <b>12 (24)</b>      |
| $\omega_{14} e$ | 140 <b>9 (18)</b>       |
| $\omega_{15} e$ | 124 <b>156 (312)</b>    |
| $\omega_{16} e$ | 28 <b>5 (10)</b>        |



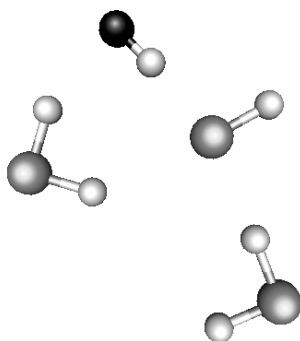

$C_s$  symmetry, 3 imaginary frequencies ( $3a''$ )

HF-SH<sup>-</sup> unit

|             | $r(H_b-F)$ | $r(S-H_b)$ | $r(S-H_t)$ | $\theta(S-H_b-F)$ | $\theta(H-S-H)$ | $zpe$ | $E_{MP2}$    | $E_{e/BSSE}$ | $\Delta E_{e/BSSE}$ | $\Delta E_{e/BSSE/Corr}$ |
|-------------|------------|------------|------------|-------------------|-----------------|-------|--------------|--------------|---------------------|--------------------------|
| <i>pvdz</i> | 0.985      | 1.972      | 1.350      | 172.0             | 104.1           | 32.4  | -1296.323138 | -1296.316558 | 3.6                 | 3.0                      |
| <i>pvtz</i> | 0.982      | 1.964      | 1.339      | 173.8             | 100.0           | 32.6  | -1296.572455 | -1296.568387 | 3.5                 | 2.7                      |

SH<sub>2</sub> bound to H-F and SH<sup>-</sup>

|             | $r(H...F)$ | $r(H...S)$ | $r(S-H_F)$ | $r(S-H_S)$ | $\theta(H-S-H)$ |
|-------------|------------|------------|------------|------------|-----------------|
| <i>pvdz</i> | 2.204      | 2.692      | 1.355      | 1.353      | 90.8            |
| <i>pvtz</i> | 2.175      | 2.686      | 1.342      | 1.341      | 90.7            |

SH<sub>2</sub> bound to SH<sup>-</sup>

|             | $r(H...S)$ | $r(S-H_S)$ | $r(S-H_t)$ | $\theta(H-S-H)$ |
|-------------|------------|------------|------------|-----------------|
| <i>pvdz</i> | 2.303      | 1.384      | 1.350      | 92.4            |
| <i>pvtz</i> | 2.267      | 1.375      | 1.336      | 92.3            |

|                   | <i>MP2/aug-cc-pvtz</i> |
|-------------------|------------------------|
| $\omega_1 a'$     | 2908 <b>2655</b>       |
| $\omega_2 a'$     | 2778 <b>2</b>          |
| $\omega_3 a'$     | 2751 <b>40</b>         |
| $\omega_4 a'$     | 2739 <b>17</b>         |
| $\omega_5 a'$     | 2716 <b>130</b>        |
| $\omega_6 a'$     | 2289 <b>2047</b>       |
| $\omega_7 a'$     | 1220 <b>4</b>          |
| $\omega_8 a'$     | 1205 <b>10</b>         |
| $\omega_9 a'$     | 987 <b>52</b>          |
| $\omega_{10} a'$  | 369 <b>6</b>           |
| $\omega_{11} a'$  | 272 <b>16</b>          |
| $\omega_{12} a'$  | 255 <b>31</b>          |
| $\omega_{13} a'$  | 180 <b>35</b>          |
| $\omega_{14} a'$  | 119 <b>22</b>          |
| $\omega_{15} a'$  | 107 <b>10</b>          |
| $\omega_{16} a'$  | 64 <b>2</b>            |
| $\omega_{17} a'$  | 11 <1                  |
| $\omega_{18} a''$ | 831 <b>26</b>          |
| $\omega_{19} a''$ | 481 <b>2</b>           |
| $\omega_{20} a''$ | 323 <b>4</b>           |
| $\omega_{21} a''$ | 177 <b>1</b>           |
| $\omega_{22} a''$ | 26i <b>1</b>           |
| $\omega_{23} a''$ | 91i <b>6</b>           |
| $\omega_{24} a''$ | 214i <b>17</b>         |

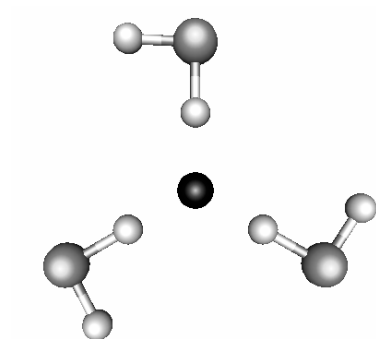

$C_{3h}$  symmetry, 3 imaginary frequencies ( $1a' + 2e''$ )

|             | $r(F-H_b)$ | $r(S-H_b)$ | $r(S-H_t)$ | $\theta(F-H_b-S)$ | $\theta(H-S-H)$ | $\theta(H_b-F-H_b)$ | $zpe$ | $E_{MP2}$    | $E_{e/BSSE}$ | $\Delta E_{e/BSSE}$ | $\Delta E_{e/BSSE/Corr}$ |
|-------------|------------|------------|------------|-------------------|-----------------|---------------------|-------|--------------|--------------|---------------------|--------------------------|
| <i>pvdz</i> | 1.559      | 1.415      | 1.349      | 180.0             | 93.2            | 120.0               | 31.1  | -1296.321644 | -1296.314762 | 4.7                 | 2.9                      |
| <i>pvtz</i> | 1.550      | 1.404      | 1.336      | 179.8             | 93.0            | 120.0               | 31.0  | -1296.567500 | -1296.563317 | 6.7                 | 4.3                      |

|                   | <i>MP2/aug-cc-pvtz</i>  |
|-------------------|-------------------------|
| $\omega_1 a'$     | 2778 <b>0</b>           |
| $\omega_2 a'$     | 2174 <b>0</b>           |
| $\omega_3 a'$     | 1228 <b>0</b>           |
| $\omega_4 a'$     | 366 <b>0</b>            |
| $\omega_5 a'$     | 168 <b>0</b>            |
| $\omega_6 a''$    | 707 <b>14</b>           |
| $\omega_7 a''$    | 25 < <b>1</b>           |
| $\omega_8 a''$    | 76i <b>27</b>           |
| $\omega_9 e'$     | 2778 <b>5 (10)</b>      |
| $\omega_{10} e'$  | 1825 <b>3693 (7386)</b> |
| $\omega_{11} e'$  | 1253 <b>4 (8)</b>       |
| $\omega_{12} e'$  | 390 <b>48 (96)</b>      |
| $\omega_{13} e'$  | 160 <b>340 (680)</b>    |
| $\omega_{14} e'$  | 10 < <b>1 (1)</b>       |
| $\omega_{15} e''$ | 690 <b>0</b>            |
| $\omega_{16} e''$ | 21i <b>0</b>            |

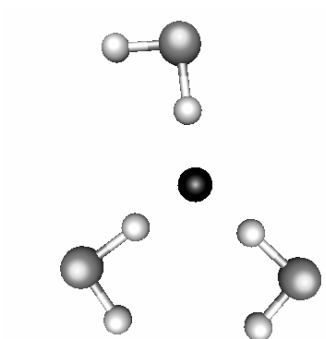

$C_S$  symmetry, 2 imaginary frequencies ( $2a''$ )

|             | $r(F-H_b)$     | $r(S-H_b)$ | $r(S-H_l)$ | $\theta(F-H_b-S)$ | $\theta(H-S-H)$ | $\theta(H_b-F-H_b)$  | $zpe$ | $E_{MP2}$    | $E_e/BSSE$   | $\Delta E_e/BSSE$ | $\Delta E_e/BSSE/Corr$ |
|-------------|----------------|------------|------------|-------------------|-----------------|----------------------|-------|--------------|--------------|-------------------|------------------------|
| <i>pvdz</i> | 1.570 <i>t</i> | 1.411      | 1.349      | 179.3             | 93.2            | 137.4 ( <i>t-r</i> ) | 31.2  | -1296.321748 | -1296.314697 | 4.8               | 3.0                    |
|             | 1.562 <i>r</i> | 1.414      | 1.350      | 177.9             | 93.0            | 104.1 ( <i>r-l</i> ) |       |              |              |                   |                        |
|             | 1.545 <i>l</i> | 1.419      | 1.350      | 178.8             | 93.1            | 118.5 ( <i>l-t</i> ) |       |              |              |                   |                        |
| <i>pvtz</i> | 1.558 <i>t</i> | 1.402      | 1.336      | 179.2             | 92.9            | 136.9 ( <i>t-r</i> ) | 31.0  | -1296.567592 | -1296.563343 | 6.7               | 4.3                    |
|             | 1.553 <i>r</i> | 1.403      | 1.336      | 177.9             | 92.9            | 103.4 ( <i>r-l</i> ) |       |              |              |                   |                        |
|             | 1.539 <i>l</i> | 1.408      | 1.337      | 178.7             | 92.9            | 119.7 ( <i>l-t</i> ) |       |              |              |                   |                        |

*t*=top, *r*=right, *l*=left

|                   | <i>MP2/aug-cc-pvtz</i> |
|-------------------|------------------------|
| $\omega_1 a'$     | 2778 4                 |
| $\omega_2 a'$     | 2776 5                 |
| $\omega_3 a'$     | 2775 4                 |
| $\omega_4 a'$     | 2180 13                |
| $\omega_5 a'$     | 1852 4599              |
| $\omega_6 a'$     | 1793 2613              |
| $\omega_7 a'$     | 1261 5                 |
| $\omega_8 a'$     | 1246 1                 |
| $\omega_9 a'$     | 1227 4                 |
| $\omega_{10} a'$  | 404 65                 |
| $\omega_{11} a'$  | 382 29                 |
| $\omega_{12} a'$  | 360 1                  |
| $\omega_{13} a'$  | 193 312                |
| $\omega_{14} a'$  | 164 196                |
| $\omega_{15} a'$  | 131 179                |
| $\omega_{16} a'$  | 23 <1                  |
| $\omega_{17} a'$  | 13 <1                  |
| $\omega_{18} a''$ | 712 10                 |
| $\omega_{19} a''$ | 686 1                  |
| $\omega_{20} a''$ | 682 2                  |
| $\omega_{21} a''$ | 50 7                   |
| $\omega_{22} a''$ | 23 <1                  |
| $\omega_{23} a''$ | 32i 15                 |
| $\omega_{24} a''$ | 119i <1                |

## Pentamer Structures: F<sup>-</sup>-(H<sub>2</sub>S)<sub>4</sub>

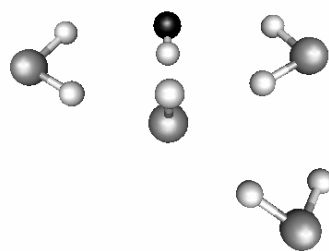

*C*<sub>1</sub> symmetry, minimum

FH...SH<sup>-</sup> core

|             | <i>r</i> (F-H <sub>b</sub> ) | <i>r</i> (S-H <sub>b</sub> ) | <i>r</i> (S-H <sub>l</sub> ) | ∠(F-H <sub>b</sub> -S) | ∠(H-S-H) | <i>zpe</i> | <i>E</i> <sub>MP2</sub> | <i>E</i> <sub><i>e</i>/BSSE</sub> | Δ <i>E</i> <sub><i>e</i>/BSSE</sub> | Δ <i>E</i> <sub><i>e</i>/BSSE/Corr</sub> |
|-------------|------------------------------|------------------------------|------------------------------|------------------------|----------|------------|-------------------------|-----------------------------------|-------------------------------------|------------------------------------------|
| <i>pvdz</i> | 0.976                        | 2.013                        | 1.353                        | 178.8                  | 96.4     | 44.0       | -1695.198223            | -1695.188495                      | 0.0                                 | 0.0                                      |

Bottom SH<sub>2</sub> bound to SH<sup>-</sup> and SH<sub>2</sub>

|             | <i>r</i> (H...S) | <i>r</i> (H...SH <sub>2</sub> ) | <i>r</i> (S-H <sub>SH<sup>-</sup></sub> ) | <i>r</i> (S-H <sub>SH<sub>2</sub></sub> ) | ∠(H-S-H) |
|-------------|------------------|---------------------------------|-------------------------------------------|-------------------------------------------|----------|
| <i>pvdz</i> | 2.373            | 2.979                           | 1.375                                     | 1.351                                     | 91.8     |

SH<sub>2</sub>'s bound to core

|             | <i>r</i> (H...F) | <i>r</i> (H...S) | <i>r</i> (S-H <sub><i>r</i></sub> ) | <i>r</i> (S-H <sub><i>s</i></sub> ) | ∠(H-S-H) |
|-------------|------------------|------------------|-------------------------------------|-------------------------------------|----------|
| <i>pvdz</i> | 2.714 <i>r</i>   | 2.365            | 1.351                               | 1.377                               | 90.9     |
|             | 2.628 <i>l</i>   | 2.407            | 1.351                               | 1.373                               | 90.8     |

*r*=right, *l*=left

|                                | <i>MP2/aug-cc-pvdz</i> |
|--------------------------------|------------------------|
| <b>ω<sub>1</sub> <i>a</i></b>  | 2973 <b>1830</b>       |
| <b>ω<sub>2</sub> <i>a</i></b>  | 2754 <b>2</b>          |
| <b>ω<sub>3</sub> <i>a</i></b>  | 2752 <b>1</b>          |
| <b>ω<sub>4</sub> <i>a</i></b>  | 2747 <b>1</b>          |
| <b>ω<sub>5</sub> <i>a</i></b>  | 2728 <b>10</b>         |
| <b>ω<sub>6</sub> <i>a</i></b>  | 2481 <b>80</b>         |
| <b>ω<sub>7</sub> <i>a</i></b>  | 2442 <b>2205</b>       |
| <b>ω<sub>8</sub> <i>a</i></b>  | 2402 <b>614</b>        |
| <b>ω<sub>9</sub> <i>a</i></b>  | 1198 <b>3</b>          |
| <b>ω<sub>10</sub> <i>a</i></b> | 1185 <b>25</b>         |
| <b>ω<sub>11</sub> <i>a</i></b> | 1181 <b>9</b>          |
| <b>ω<sub>12</sub> <i>a</i></b> | 898 <b>22</b>          |
| <b>ω<sub>13</sub> <i>a</i></b> | 859 <b>70</b>          |
| <b>ω<sub>14</sub> <i>a</i></b> | 535 <b>3</b>           |
| <b>ω<sub>15</sub> <i>a</i></b> | 502 <b>3</b>           |
| <b>ω<sub>16</sub> <i>a</i></b> | 478 <b>4</b>           |
| <b>ω<sub>17</sub> <i>a</i></b> | 323 <b>10</b>          |
| <b>ω<sub>18</sub> <i>a</i></b> | 286 <b>4</b>           |
| <b>ω<sub>19</sub> <i>a</i></b> | 271 <b>7</b>           |
| <b>ω<sub>20</sub> <i>a</i></b> | 252 <b>15</b>          |
| <b>ω<sub>21</sub> <i>a</i></b> | 242 <b>2</b>           |
| <b>ω<sub>22</sub> <i>a</i></b> | 230 <b>32</b>          |
| <b>ω<sub>23</sub> <i>a</i></b> | 215 <b>13</b>          |
| <b>ω<sub>24</sub> <i>a</i></b> | 193 <b>5</b>           |
| <b>ω<sub>25</sub> <i>a</i></b> | 164 <b>5</b>           |
| <b>ω<sub>26</sub> <i>a</i></b> | 146 <b>60</b>          |
| <b>ω<sub>27</sub> <i>a</i></b> | 96 <b>7</b>            |
| <b>ω<sub>28</sub> <i>a</i></b> | 93 <b>1</b>            |
| <b>ω<sub>29</sub> <i>a</i></b> | 58 < <b>1</b>          |
| <b>ω<sub>30</sub> <i>a</i></b> | 55 <b>1</b>            |
| <b>ω<sub>31</sub> <i>a</i></b> | 29 <b>1</b>            |
| <b>ω<sub>32</sub> <i>a</i></b> | 22 < <b>1</b>          |
| <b>ω<sub>33</sub> <i>a</i></b> | 17 <b>1</b>            |

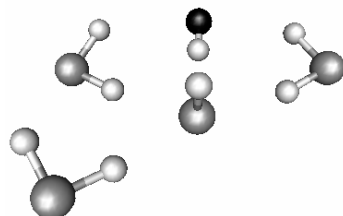

$C_1$  symmetry, minimum

FH...SH<sup>-</sup> core

|             | $r(F-H_b)$ | $r(S-H_b)$ | $r(S-H_l)$ | $\theta(F-H_b-S)$ | $\theta(H-S-H)$ | $zpe$ | $E_{MP2}$    | $E_{e/BSSE}$ | $\Delta E_{e/BSSE}$ | $\Delta E_{e/BSSE/Corr}$ |
|-------------|------------|------------|------------|-------------------|-----------------|-------|--------------|--------------|---------------------|--------------------------|
| <i>pvdz</i> | 0.976      | 2.018      | 1.354      | 179.1             | 91.8            | 44.0  | -1695.197936 | -1695.188245 | 0.2                 | 0.2                      |

Bottom SH<sub>2</sub> bound to SH

|             | $r(H...S)$ | $r(S-H_{SH})$ | $r(S-H_l)$ | $\theta(H-S-H)$ |
|-------------|------------|---------------|------------|-----------------|
| <i>pvdz</i> | 2.362      | 1.377         | 1.351      | 91.9            |

SH<sub>2</sub>'s bound to core

|             | $r(H...F)$     | $r(H...S)$ | $r(S-H_r)$ | $r(S-H_l)$ | $\theta(H-S-H)$ |
|-------------|----------------|------------|------------|------------|-----------------|
| <i>pvdz</i> | 2.628 <i>r</i> | 2.404      | 1.351      | 1.373      | 90.8            |
|             | 2.750 <i>l</i> | 2.366      | 1.351      | 1.376      | 91.0            |

*r*=right, *l*=left

|                 | <i>MP2/aug-cc-pvdz</i> |
|-----------------|------------------------|
| $\omega_1 a$    | 2982 1851              |
| $\omega_2 a$    | 2754 2                 |
| $\omega_3 a$    | 2753 1                 |
| $\omega_4 a$    | 2749 <1                |
| $\omega_5 a$    | 2724 10                |
| $\omega_6 a$    | 2478 113               |
| $\omega_7 a$    | 2433 2335              |
| $\omega_8 a$    | 2400 560               |
| $\omega_9 a$    | 1200 3                 |
| $\omega_{10} a$ | 1185 28                |
| $\omega_{11} a$ | 1182 8                 |
| $\omega_{12} a$ | 888 23                 |
| $\omega_{13} a$ | 856 67                 |
| $\omega_{14} a$ | 541 2                  |
| $\omega_{15} a$ | 497 <1                 |
| $\omega_{16} a$ | 473 6                  |
| $\omega_{17} a$ | 325 19                 |
| $\omega_{18} a$ | 290 14                 |
| $\omega_{19} a$ | 275 2                  |
| $\omega_{20} a$ | 250 6                  |
| $\omega_{21} a$ | 245 4                  |
| $\omega_{22} a$ | 230 37                 |
| $\omega_{23} a$ | 204 16                 |
| $\omega_{24} a$ | 191 2                  |
| $\omega_{25} a$ | 159 5                  |
| $\omega_{26} a$ | 147 64                 |
| $\omega_{27} a$ | 95 5                   |
| $\omega_{28} a$ | 91 2                   |
| $\omega_{29} a$ | 57 <1                  |
| $\omega_{30} a$ | 52 1                   |
| $\omega_{31} a$ | 29 1                   |
| $\omega_{32} a$ | 22 <1                  |
| $\omega_{33} a$ | 17 1                   |

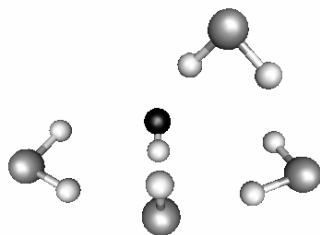

$C_1$  symmetry, minimum

|             | $r(F-H_b)$ | $r(S-H_b)$ | $r(S-H_l)$ | $\theta(F-H_b-S)$ | $\theta(H-S-H)$ | $zpe$ | $E_{MP2}$    | $E_{e/BSSE}$ | $\Delta E_{e/BSSE}$ | $\Delta E_{e/BSSE/Corr}$ |
|-------------|------------|------------|------------|-------------------|-----------------|-------|--------------|--------------|---------------------|--------------------------|
| <i>pvdz</i> | 0.997      | 1.932      | 1.354      | 177.5             | 92.1            | 43.8  | -1695.196611 | -1695.186646 | 1.2                 | 1.0                      |

Top  $SH_2$  bound to F and  $SH_2$

|             | $r(H...F)$ | $r(H...SH_2)$ | $r(S-H_r)$ | $r(S-H_s)$ | $\theta(H-S-H)$ |
|-------------|------------|---------------|------------|------------|-----------------|
| <i>pvdz</i> | 2.088      | 2.771         | 1.357      | 1.354      | 91.4            |

$SH_2$ 's bound to core

|             | $r(H...F)$     | $r(H...S)$ | $r(S-H_r)$     | $r(S-H_s)$ | $\theta(H-S-H)$ |
|-------------|----------------|------------|----------------|------------|-----------------|
| <i>pvdz</i> | 3.175 <i>r</i> | 2.260      | 1.351          | 1.389      | 91.8            |
|             | 2.626 <i>l</i> | 2.388      | 1.351 <i>l</i> | 1.375      | 90.7            |

*r*=right, *l*=left

|                 | <i>MP2/aug-cc-pvdz</i> |
|-----------------|------------------------|
| $\omega_1 a$    | 2756 <b>19</b>         |
| $\omega_2 a$    | 2752 <b>1</b>          |
| $\omega_3 a$    | 2723 <b>19</b>         |
| $\omega_4 a$    | 2715 <b>195</b>        |
| $\omega_5 a$    | 2702 <b>197</b>        |
| $\omega_6 a$    | 2593 <b>1982</b>       |
| $\omega_7 a$    | 2436 <b>728</b>        |
| $\omega_8 a$    | 2251 <b>1746</b>       |
| $\omega_9 a$    | 1201 <b>4</b>          |
| $\omega_{10} a$ | 1188 <b>6</b>          |
| $\omega_{11} a$ | 1182 <b>16</b>         |
| $\omega_{12} a$ | 997 <b>31</b>          |
| $\omega_{13} a$ | 905 <b>60</b>          |
| $\omega_{14} a$ | 590 <b>4</b>           |
| $\omega_{15} a$ | 492 <b>3</b>           |
| $\omega_{16} a$ | 366 <b>7</b>           |
| $\omega_{17} a$ | 348 <b>19</b>          |
| $\omega_{18} a$ | 293 <b>2</b>           |
| $\omega_{19} a$ | 289 <b>12</b>          |
| $\omega_{20} a$ | 272 <b>10</b>          |
| $\omega_{21} a$ | 254 <b>18</b>          |
| $\omega_{22} a$ | 243 <b>6</b>           |
| $\omega_{23} a$ | 232 <b>16</b>          |
| $\omega_{24} a$ | 191 <b>7</b>           |
| $\omega_{25} a$ | 159 <b>23</b>          |
| $\omega_{26} a$ | 141 <b>62</b>          |
| $\omega_{27} a$ | 114 <b>5</b>           |
| $\omega_{28} a$ | 97 <b>1</b>            |
| $\omega_{29} a$ | 73 <b>1</b>            |
| $\omega_{30} a$ | 48 <b>&lt;1</b>        |
| $\omega_{31} a$ | 29 <b>1</b>            |
| $\omega_{32} a$ | 16 <b>1</b>            |
| $\omega_{33} a$ | 13 <b>&lt;1</b>        |

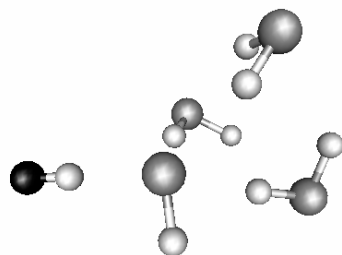

$C_1$  symmetry, minimum

HF-SH unit

|             | $r(F-H_b)$ | $r(S-H_b)$ | $r(S-H_l)$ | $\theta(F-H_b-S)$ | $\theta(H-S-H)$ | $zpe$ | $E_{MP2}$    | $E_{e/BSSE}$ | $\Delta E_{e/BSSE}$ | $\Delta E_{e/BSSE/Corr}$ |
|-------------|------------|------------|------------|-------------------|-----------------|-------|--------------|--------------|---------------------|--------------------------|
| <i>pvdz</i> | 0.967      | 2.061      | 1.353      | 179.6             | 96.1            | 44.3  | -1695.197605 | -1695.186986 | 1.0                 | 1.3                      |

Other SH<sub>2</sub> units

|             | $r(H...S)$     | $r(H...SH_2)$ | $r(S-H_s)$ | $r(S-H)$ | $\theta(H-S-H)$ |
|-------------|----------------|---------------|------------|----------|-----------------|
| <i>pvdz</i> | 2.424 <i>t</i> | 2.846         | 1.368      | 1.355    | 90.9            |
|             | 2.389 <i>r</i> | 2.888         | 1.377      | 1.353    | 90.9            |
|             | 2.371 <i>m</i> | 2.861         | 1.377      | 1.353    | 91.0            |

*t*=top, *r*=right, *l*=left

|                 | <i>MP2/aug-cc-pvdz</i> |
|-----------------|------------------------|
| $\omega_1 a$    | 3172 <b>2372</b>       |
| $\omega_2 a$    | 2733 <b>21</b>         |
| $\omega_3 a$    | 2729 <b>15</b>         |
| $\omega_4 a$    | 2725 <b>16</b>         |
| $\omega_5 a$    | 2709 <b>31</b>         |
| $\omega_6 a$    | 2542 <b>606</b>        |
| $\omega_7 a$    | 2438 <b>937</b>        |
| $\omega_8 a$    | 2400 <b>450</b>        |
| $\omega_9 a$    | 1188 <b>9</b>          |
| $\omega_{10} a$ | 1186 <b>13</b>         |
| $\omega_{11} a$ | 1182 <b>7</b>          |
| $\omega_{12} a$ | 866 <b>28</b>          |
| $\omega_{13} a$ | 768 <b>36</b>          |
| $\omega_{14} a$ | 525 <b>8</b>           |
| $\omega_{15} a$ | 506 <b>9</b>           |
| $\omega_{16} a$ | 462 <b>8</b>           |
| $\omega_{17} a$ | 348 <b>1</b>           |
| $\omega_{18} a$ | 344 <b>6</b>           |
| $\omega_{19} a$ | 276 <b>1</b>           |
| $\omega_{20} a$ | 273 <b>16</b>          |
| $\omega_{21} a$ | 235 <b>8</b>           |
| $\omega_{22} a$ | 227 <b>9</b>           |
| $\omega_{23} a$ | 214 <b>27</b>          |
| $\omega_{24} a$ | 205 <b>9</b>           |
| $\omega_{25} a$ | 156 <b>&lt;1</b>       |
| $\omega_{26} a$ | 136 <b>28</b>          |
| $\omega_{27} a$ | 102 <b>8</b>           |
| $\omega_{28} a$ | 96 <b>8</b>            |
| $\omega_{29} a$ | 81 <b>3</b>            |
| $\omega_{30} a$ | 59 <b>2</b>            |
| $\omega_{31} a$ | 54 <b>1</b>            |
| $\omega_{32} a$ | 17 <b>&lt;1</b>        |
| $\omega_{33} a$ | 13 <b>&lt;1</b>        |

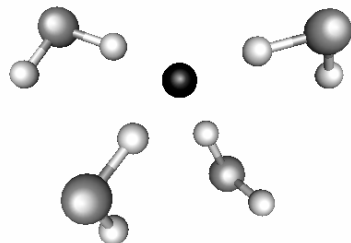

$C_1$  symmetry, minimum

|             | $r(F-H_b)$      | $r(S-H_b)$ | $r(S-H_t)$ | $\theta(F-H_b-S)$ | $\theta(H-S-H)$ | $\theta(H_b-F-H_b)$ | $zpe$ | $E_{MP2}$    | $E_{e/BSSE}$ | $\Delta E_{e/BSSE}$ | $\Delta E_{e/BSSE/Corr}$ |
|-------------|-----------------|------------|------------|-------------------|-----------------|---------------------|-------|--------------|--------------|---------------------|--------------------------|
| <i>pvdz</i> | 1.693 <i>tl</i> | 1.387      | 1.351      | 172.3             | 91.6            | 134.0 <i>tl-tr</i>  | 43.1  | -1695.194551 | -1695.184940 | 2.2                 | 1.3                      |
|             | 1.670 <i>tr</i> | 1.391      | 1.350      | 173.4             | 91.9            | 91.1 <i>tr-br</i>   |       |              |              |                     |                          |
|             | 1.676 <i>bl</i> | 1.390      | 1.351      | 172.9             | 91.7            | 90.7 <i>br-bl</i>   |       |              |              |                     |                          |
|             | 1.630 <i>br</i> | 1.399      | 1.350      | 175.7             | 92.4            | 90.4 <i>bl-tl</i>   |       |              |              |                     |                          |

*tl*=top left, *tr*=top right, *bl*=bottom left, *br*=bottom right

|                 | <i>MP2/aug-cc-pvdz</i> |
|-----------------|------------------------|
| $\omega_1 a$    | 2757 <b>3</b>          |
| $\omega_2 a$    | 2755 <b>1</b>          |
| $\omega_3 a$    | 2753 < <b>1</b>        |
| $\omega_4 a$    | 2752 < <b>1</b>        |
| $\omega_5 a$    | 2431 <b>57</b>         |
| $\omega_6 a$    | 2237 <b>1929</b>       |
| $\omega_7 a$    | 2205 <b>1949</b>       |
| $\omega_8 a$    | 2104 <b>1185</b>       |
| $\omega_9 a$    | 1228 <b>2</b>          |
| $\omega_{10} a$ | 1221 <b>11</b>         |
| $\omega_{11} a$ | 1213 <b>12</b>         |
| $\omega_{12} a$ | 1210 <b>11</b>         |
| $\omega_{13} a$ | 692 <b>28</b>          |
| $\omega_{14} a$ | 648 <b>24</b>          |
| $\omega_{15} a$ | 614 <b>5</b>           |
| $\omega_{16} a$ | 602 <b>8</b>           |
| $\omega_{17} a$ | 357 <b>30</b>          |
| $\omega_{18} a$ | 329 <b>23</b>          |
| $\omega_{19} a$ | 329 <b>7</b>           |
| $\omega_{20} a$ | 321 <b>10</b>          |
| $\omega_{21} a$ | 216 <b>121</b>         |
| $\omega_{22} a$ | 212 <b>116</b>         |
| $\omega_{23} a$ | 202 <b>74</b>          |
| $\omega_{24} a$ | 173 <b>1</b>           |
| $\omega_{25} a$ | 143 <b>17</b>          |
| $\omega_{26} a$ | 136 <b>27</b>          |
| $\omega_{27} a$ | 127 <b>20</b>          |
| $\omega_{28} a$ | 43 <b>1</b>            |
| $\omega_{29} a$ | 40 <b>2</b>            |
| $\omega_{30} a$ | 35 <b>5</b>            |
| $\omega_{31} a$ | 33 < <b>1</b>          |
| $\omega_{32} a$ | 18 < <b>1</b>          |
| $\omega_{33} a$ | 15 <b>1</b>            |



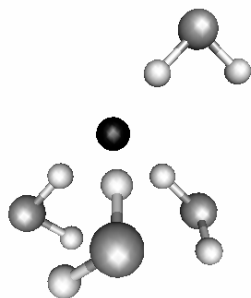

$C_1$  symmetry, minimum

|             | $r(F-H_b)$     | $r(S-H_b)$ | $r(S-H_l)$ | $\theta(F-H_b-S)$ | $\theta(H-S-H)$ | $\theta(H_b-F-H_b)$ | $zpe$ | $E_{MP2}$    | $E_e/BSSE$   | $\Delta E_e/BSSE$ | $\Delta E_e/BSSE/Corr$ |
|-------------|----------------|------------|------------|-------------------|-----------------|---------------------|-------|--------------|--------------|-------------------|------------------------|
| <i>pvdz</i> | 1.660 <i>t</i> | 1.392      | 1.350      | 173.5             | 92.0            | 90.3 <i>t-r</i>     | 43.3  | -1695.195068 | -1695.185210 | 2.1               | 1.4                    |
|             | 1.676 <i>r</i> | 1.391      | 1.351      | 174.2             | 91.4            | 89.6 <i>r-m</i>     |       |              |              |                   |                        |
|             | 1.675 <i>m</i> | 1.390      | 1.351      | 171.6             | 91.5            | 91.0 <i>m-l</i>     |       |              |              |                   |                        |
|             | 1.681 <i>l</i> | 1.390      | 1.351      | 171.6             | 91.4            | 123.0 <i>l-t</i>    |       |              |              |                   |                        |

*t*=top, *r*=right, *m*=middle, *l*=left

|                 | <i>MP2/aug-cc-pvdz</i> |
|-----------------|------------------------|
| $\omega_1 a$    | 2754 <b>1</b>          |
| $\omega_2 a$    | 2750 <b>1</b>          |
| $\omega_3 a$    | 2749 <b>1</b>          |
| $\omega_4 a$    | 2748 < <b>1</b>        |
| $\omega_5 a$    | 2434 <b>215</b>        |
| $\omega_6 a$    | 2203 <b>1395</b>       |
| $\omega_7 a$    | 2195 <b>1983</b>       |
| $\omega_8 a$    | 2183 <b>1086</b>       |
| $\omega_9 a$    | 1223 <b>9</b>          |
| $\omega_{10} a$ | 1216 <b>11</b>         |
| $\omega_{11} a$ | 1213 <b>16</b>         |
| $\omega_{12} a$ | 1207 <b>8</b>          |
| $\omega_{13} a$ | 654 <b>31</b>          |
| $\omega_{14} a$ | 636 <b>32</b>          |
| $\omega_{15} a$ | 627 <b>13</b>          |
| $\omega_{16} a$ | 617 <b>1</b>           |
| $\omega_{17} a$ | 341 <b>34</b>          |
| $\omega_{18} a$ | 336 <b>18</b>          |
| $\omega_{19} a$ | 326 <b>4</b>           |
| $\omega_{20} a$ | 325 <b>8</b>           |
| $\omega_{21} a$ | 254 < <b>1</b>         |
| $\omega_{22} a$ | 224 <b>164</b>         |
| $\omega_{23} a$ | 192 <b>100</b>         |
| $\omega_{24} a$ | 176 <b>12</b>          |
| $\omega_{25} a$ | 155 <b>11</b>          |
| $\omega_{26} a$ | 152 <b>59</b>          |
| $\omega_{27} a$ | 128 <b>4</b>           |
| $\omega_{28} a$ | 113 <b>11</b>          |
| $\omega_{29} a$ | 47 <b>1</b>            |
| $\omega_{30} a$ | 41 <b>1</b>            |
| $\omega_{31} a$ | 39 <b>1</b>            |
| $\omega_{32} a$ | 28 <b>1</b>            |
| $\omega_{33} a$ | 14 < <b>1</b>          |

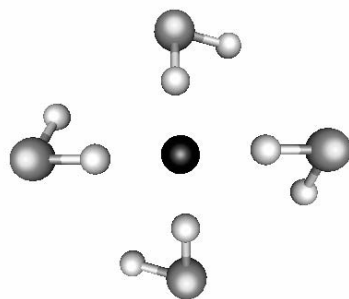

$C_2$  symmetry, minimum

|             | $r(F-H_b)$                           | $r(S-H_b)$     | $r(S-H_t)$     | $\theta(F-H_b-S)$ | $\theta(H-S-H)$ | $\theta(H_b-F-H_b)$                        | $zpe$ | $E_{MP2}$    | $E_{e/BSSE}$ | $\Delta E_{e/BSSE}$ | $\Delta E_{e/BSSE/Corr}$ |
|-------------|--------------------------------------|----------------|----------------|-------------------|-----------------|--------------------------------------------|-------|--------------|--------------|---------------------|--------------------------|
| <i>pvdz</i> | 1.684 <i>t/b</i><br>1.680 <i>l/r</i> | 1.389<br>1.390 | 1.351<br>1.351 | 176.6<br>173.1    | 91.8<br>91.9    | 84.9 <i>t-l/b-r</i><br>86.3 <i>l-b/r-t</i> | 43.3  | -1695.193520 | -1695.183815 | 2.9                 | 2.2                      |

*t*=top, *b*=bottom, *l*=left, *r*=right

|                 | <i>MP2/aug-cc-pvdz</i> |
|-----------------|------------------------|
| $\omega_1 a$    | 2753 <1                |
| $\omega_2 a$    | 2751 <1                |
| $\omega_3 a$    | 2446 <b>205</b>        |
| $\omega_4 a$    | 2198 <b>59</b>         |
| $\omega_5 a$    | 1241 <1                |
| $\omega_6 a$    | 1203 <b>2</b>          |
| $\omega_7 a$    | 627 <b>3</b>           |
| $\omega_8 a$    | 618 <b>7</b>           |
| $\omega_9 a$    | 342 <b>6</b>           |
| $\omega_{10} a$ | 332 <b>18</b>          |
| $\omega_{11} a$ | 222 <b>7</b>           |
| $\omega_{12} a$ | 199 <b>15</b>          |
| $\omega_{13} a$ | 112 <b>2</b>           |
| $\omega_{14} a$ | 82 <b>1</b>            |
| $\omega_{15} a$ | 46 <1                  |
| $\omega_{16} a$ | 38 <1                  |
| $\omega_{17} a$ | 10 <1                  |
| $\omega_{18} b$ | 2752 <b>1</b>          |
| $\omega_{19} b$ | 2752 <1                |
| $\omega_{20} b$ | 2212 <b>1889</b>       |
| $\omega_{21} b$ | 2202 <b>2368</b>       |
| $\omega_{22} b$ | 1232 <b>5</b>          |
| $\omega_{23} b$ | 1210 <b>21</b>         |
| $\omega_{24} b$ | 637 <b>37</b>          |
| $\omega_{25} b$ | 597 <b>23</b>          |
| $\omega_{26} b$ | 353 <b>24</b>          |
| $\omega_{27} b$ | 324 <b>15</b>          |
| $\omega_{28} b$ | 197 <b>153</b>         |
| $\omega_{29} b$ | 187 <b>124</b>         |
| $\omega_{30} b$ | 170 <b>70</b>          |
| $\omega_{31} b$ | 154 <b>11</b>          |
| $\omega_{32} b$ | 47 <b>2</b>            |
| $\omega_{33} b$ | 44 <b>2</b>            |

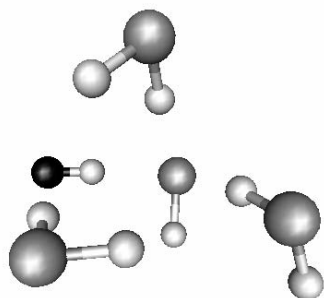

$C_1$  symmetry, minimum

HF-SH<sup>-</sup> unit

|             | $r(F-H_b)$ | $r(S-H_b)$ | $r(S-H_d)$ | $\theta(F-H_b-S)$ | $\theta(H-S-H)$ | $zpe$ | $E_{MP2}$    | $E_{e/BSSE}$ | $\Delta E_{e/BSSE}$ | $\Delta E_{e/BSSE/Corr}$ |
|-------------|------------|------------|------------|-------------------|-----------------|-------|--------------|--------------|---------------------|--------------------------|
| <i>pvdz</i> | 0.985      | 1.973      | 1.354      | 174.0             | 88.5            | 44.2  | -1695.195754 | -1695.184976 | 2.2                 | 2.4                      |

SH<sub>2</sub> bound to F and SH<sub>2</sub>

|             | $r(H...F)$ | $r(H...SH_2)$ | $r(S-H_F)$ | $r(S-H_S)$ | $\theta(H-S-H)$ |
|-------------|------------|---------------|------------|------------|-----------------|
| <i>pvdz</i> | 2.086      | 2.734         | 1.357      | 1.356      | 93.0            |

SH<sub>2</sub> bound to S<sup>-</sup> only

|             | $r(H...S)$ | $r(S-H_S)$ | $r(S-H_d)$ | $\theta(H-S-H)$ |
|-------------|------------|------------|------------|-----------------|
| <i>pvdz</i> | 2.291      | 1.386      | 1.351      | 92.0            |

SH<sub>2</sub> bound to S<sup>-</sup> and SH<sub>2</sub>

|             | $r(H...S)$ | $r(H...SH_2)$ | $r(S-H_S)$ | $r(S-H_{SH_2})$ | $\theta(H-S-H)$ |
|-------------|------------|---------------|------------|-----------------|-----------------|
| <i>pvdz</i> | 2.418      | 2.904         | 1.370      | 1.352           | 91.6            |

|                 | <i>MP2/aug-cc-pvdz</i> |
|-----------------|------------------------|
| $\omega_1 a$    | 2826 <b>2016</b>       |
| $\omega_2 a$    | 2747 <b>6</b>          |
| $\omega_3 a$    | 2737 <b>16</b>         |
| $\omega_4 a$    | 2718 <b>24</b>         |
| $\omega_5 a$    | 2696 <b>24</b>         |
| $\omega_6 a$    | 2668 <b>314</b>        |
| $\omega_7 a$    | 2503 <b>577</b>        |
| $\omega_8 a$    | 2293 <b>1181</b>       |
| $\omega_9 a$    | 1201 <b>6</b>          |
| $\omega_{10} a$ | 1198 <b>1</b>          |
| $\omega_{11} a$ | 1191 <b>2</b>          |
| $\omega_{12} a$ | 945 <b>38</b>          |
| $\omega_{13} a$ | 864 <b>45</b>          |
| $\omega_{14} a$ | 529 <b>7</b>           |
| $\omega_{15} a$ | 449 <b>1</b>           |
| $\omega_{16} a$ | 395 <b>5</b>           |
| $\omega_{17} a$ | 369 <b>20</b>          |
| $\omega_{18} a$ | 360 <b>22</b>          |
| $\omega_{19} a$ | 297 <b>3</b>           |
| $\omega_{20} a$ | 263 <b>19</b>          |
| $\omega_{21} a$ | 253 <b>5</b>           |
| $\omega_{22} a$ | 228 <b>27</b>          |
| $\omega_{23} a$ | 217 <b>5</b>           |
| $\omega_{24} a$ | 184 <b>5</b>           |
| $\omega_{25} a$ | 178 <b>6</b>           |
| $\omega_{26} a$ | 138 <b>37</b>          |
| $\omega_{27} a$ | 107 <b>3</b>           |
| $\omega_{28} a$ | 95 <b>10</b>           |
| $\omega_{29} a$ | 74 <b>1</b>            |
| $\omega_{30} a$ | 61 <b>1</b>            |
| $\omega_{31} a$ | 51 <b>1</b>            |
| $\omega_{32} a$ | 36 <b>1</b>            |
| $\omega_{33} a$ | 21 <b>1</b>            |

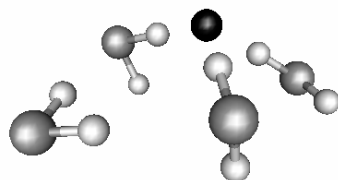

$C_1$  symmetry, minimum

|             | $r(F-H_b)$     | $r(S-H_b)$ | $r(S-H_l)$ | $\theta(F-H_b-S)$ | $\theta(H-S-H)$ | $zpe$ | $E_{MP2}$    | $E_{e/BSSE}$ | $\Delta E_{e/BSSE}$ | $\Delta E_{e/BSSE/Corr}$ |
|-------------|----------------|------------|------------|-------------------|-----------------|-------|--------------|--------------|---------------------|--------------------------|
| <i>pvdz</i> | 1.666 <i>r</i> | 1.392      | 1.350      | 174.1             | 91.9            | 42.7  | -1695.191589 | -1695.181048 | 4.7                 | 3.4                      |
|             | 1.501 <i>m</i> | 1.430      | 1.351      | 177.9             | 92.8            |       |              |              |                     |                          |
|             | 1.510 <i>l</i> | 1.426      | 1.350      | 179.3             | 93.0            |       |              |              |                     |                          |

*r*=right, *m*=middle, *l*=left

SH<sub>2</sub> bound to two SH<sub>2</sub>'s

|             | $r(H...SH_2/m)$ | $r(H...SH_2/l)$ | $r(S-H_{SH_2/m})$ | $r(S-H_{SH_2/l})$ | $\theta(H-S-H)$ |
|-------------|-----------------|-----------------|-------------------|-------------------|-----------------|
| <i>pvdz</i> | 2.616           | 2.606           | 1.359             | 1.359             | 91.6            |

|                 | <i>MP2/aug-cc-pvdz</i> |
|-----------------|------------------------|
| $\omega_1 a$    | 2755 <b>1</b>          |
| $\omega_2 a$    | 2754 <b>3</b>          |
| $\omega_3 a$    | 2751 <b>3</b>          |
| $\omega_4 a$    | 2654 <b>228</b>        |
| $\omega_5 a$    | 2641 <b>241</b>        |
| $\omega_6 a$    | 2301 <b>694</b>        |
| $\omega_7 a$    | 1925 <b>1549</b>       |
| $\omega_8 a$    | 1660 <b>3396</b>       |
| $\omega_9 a$    | 1238 <b>3</b>          |
| $\omega_{10} a$ | 1227 <b>2</b>          |
| $\omega_{11} a$ | 1213 <b>6</b>          |
| $\omega_{12} a$ | 1198 < <b>1</b>        |
| $\omega_{13} a$ | 795 <b>26</b>          |
| $\omega_{14} a$ | 753 <b>7</b>           |
| $\omega_{15} a$ | 623 <b>15</b>          |
| $\omega_{16} a$ | 398 <b>6</b>           |
| $\omega_{17} a$ | 391 <b>24</b>          |
| $\omega_{18} a$ | 382 <b>6</b>           |
| $\omega_{19} a$ | 371 < <b>1</b>         |
| $\omega_{20} a$ | 335 <b>31</b>          |
| $\omega_{21} a$ | 270 <b>2</b>           |
| $\omega_{22} a$ | 235 <b>31</b>          |
| $\omega_{23} a$ | 191 <b>195</b>         |
| $\omega_{24} a$ | 167 <b>125</b>         |
| $\omega_{25} a$ | 153 <b>181</b>         |
| $\omega_{26} a$ | 137 <b>26</b>          |
| $\omega_{27} a$ | 99 <b>6</b>            |
| $\omega_{28} a$ | 92 <b>4</b>            |
| $\omega_{29} a$ | 73 <b>10</b>           |
| $\omega_{30} a$ | 39 < <b>1</b>          |
| $\omega_{31} a$ | 25 < <b>1</b>          |
| $\omega_{32} a$ | 16 < <b>1</b>          |
| $\omega_{33} a$ | 8 < <b>1</b>           |

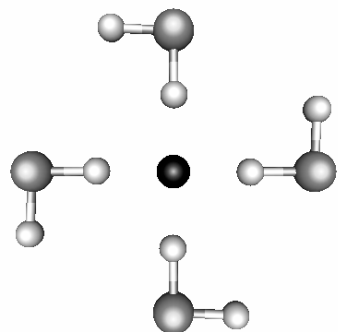

$C_{4h}$  symmetry, 4 imaginary frequencies ( $a_u$ ,  $b_u$ , and  $2e_g$ )

|             | $r(F-H_b)$ | $r(S-H_b)$ | $r(S-H_d)$ | $\theta(F-H_b-S)$ | $\theta(H-S-H)$ | $\theta(H_b-F-H_b)$ | $zpe$ | $E_{MP2}$    | $E_{e/BSSE}$ | $\Delta E_{e/BSSE}$ | $\Delta E_{e/BSSE/Corr}$ |
|-------------|------------|------------|------------|-------------------|-----------------|---------------------|-------|--------------|--------------|---------------------|--------------------------|
| <i>pvdz</i> | 1.668      | 1.391      | 1.350      | 179.1             | 92.8            | 90.0                | 42.2  | -1695.191076 | -1695.181994 | 4.1                 | 2.3                      |

|                   | <i>MP2/aug-cc-pvdz</i>  |
|-------------------|-------------------------|
| $\omega_1 a_g$    | 2757 <b>0</b>           |
| $\omega_2 a_g$    | 2432 <b>0</b>           |
| $\omega_3 a_g$    | 1208 <b>0</b>           |
| $\omega_4 a_g$    | 330 <b>0</b>            |
| $\omega_5 a_g$    | 152 <b>0</b>            |
| $\omega_6 a_u$    | 625 <b>15</b>           |
| $\omega_7 a_u$    | 34 <b>0</b>             |
| $\omega_8 a_u$    | 145i <b>41</b>          |
| $\omega_9 b_g$    | 2758 <b>0</b>           |
| $\omega_{10} b_g$ | 2185 <b>0</b>           |
| $\omega_{11} b_g$ | 1268 <b>0</b>           |
| $\omega_{12} b_g$ | 375 <b>0</b>            |
| $\omega_{13} b_g$ | 92 <b>0</b>             |
| $\omega_{14} b_g$ | 24 <b>0</b>             |
| $\omega_{15} b_u$ | 518 <b>0</b>            |
| $\omega_{16} b_u$ | 102 <b>0</b>            |
| $\omega_{17} b_u$ | 17i <b>0</b>            |
| $\omega_{18} e_g$ | 583 <b>0</b>            |
| $\omega_{19} e_g$ | 75i <b>0</b>            |
| $\omega_{20} e_u$ | 2758 <b>7 (14)</b>      |
| $\omega_{21} e_u$ | 2180 <b>2862 (5724)</b> |
| $\omega_{22} e_u$ | 1234 <b>3 (6)</b>       |
| $\omega_{23} e_u$ | 357 <b>73 (146)</b>     |
| $\omega_{24} e_u$ | 202 <b>230 (460)</b>    |
| $\omega_{25} e_u$ | 24 <b>1 (2)</b>         |

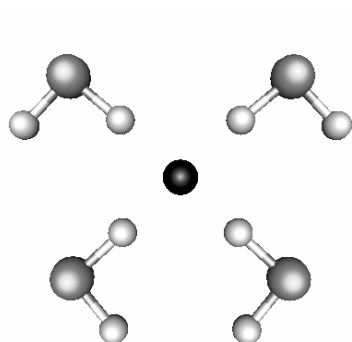

$C_s$  symmetry, 4 imaginary frequencies (all  $a''$ )

|             | $r(F-H_t)$                       | $r(S-H_b)$     | $r(S-H_t)$     | $\theta(F-H_b-S)$ | $\theta(H-S-H)$ | $\theta(H_b-F-H_b)$                                   | $zpe$ | $E_{MP2}$     | $E_{e/BSSE}$ | $\Delta E_{e/BSSE}$ | $\Delta E_{e/BSSE/Corr}$ |
|-------------|----------------------------------|----------------|----------------|-------------------|-----------------|-------------------------------------------------------|-------|---------------|--------------|---------------------|--------------------------|
| <i>pvdz</i> | 1.703 <i>t</i><br>1.644 <i>b</i> | 1.386<br>1.397 | 1.350<br>1.349 | 176.4<br>178.8    | 92.5<br>93.3    | 92.9 <i>t-t</i><br>87.2 <i>t-b</i><br>92.7 <i>b-b</i> | 42.3  | -1695.1905543 | -1695.181365 | 4.5                 | 2.8                      |

*t*=top, *b*=bottom.

|                   | <i>MP2/aug-cc-pvdz</i> |
|-------------------|------------------------|
| $\omega_1 a'$     | 2761 <b>9</b>          |
| $\omega_2 a'$     | 2760 <b>7</b>          |
| $\omega_3 a'$     | 2756 <b>4</b>          |
| $\omega_4 a'$     | 2756 <b>1</b>          |
| $\omega_5 a'$     | 2439 <b>32</b>         |
| $\omega_6 a'$     | 2260 <b>1515</b>       |
| $\omega_7 a'$     | 2166 <b>2491</b>       |
| $\omega_8 a'$     | 2106 <b>1568</b>       |
| $\omega_9 a'$     | 1269 <b>1</b>          |
| $\omega_{10} a'$  | 1238 < <b>1</b>        |
| $\omega_{11} a'$  | 1230 <b>10</b>         |
| $\omega_{12} a'$  | 1207 < <b>1</b>        |
| $\omega_{13} a'$  | 390 <b>47</b>          |
| $\omega_{14} a'$  | 361 <b>39</b>          |
| $\omega_{15} a'$  | 353 <b>30</b>          |
| $\omega_{16} a'$  | 328 <b>26</b>          |
| $\omega_{17} a$   | 206 <b>259</b>         |
| $\omega_{18} a$   | 193 <b>193</b>         |
| $\omega_{19} a$   | 149 <b>9</b>           |
| $\omega_{20} a$   | 89 < <b>1</b>          |
| $\omega_{21} a$   | 46 < <b>1</b>          |
| $\omega_{22} a$   | 39 <b>1</b>            |
| $\omega_{23} a$   | 28 <b>1</b>            |
| $\omega_{24} a''$ | 636 <b>12</b>          |
| $\omega_{25} a$   | 592 <b>0</b>           |
| $\omega_{26} a$   | 567 <b>2</b>           |
| $\omega_{27}$     | 506 <b>0</b>           |
| $\omega_{28} a''$ | 100 < <b>1</b>         |
| $\omega_{29} a''$ | 35 < <b>1</b>          |
| $\omega_{30} a''$ | 13 <i>i</i> <b>0</b>   |
| $\omega_{31} a''$ | 37 <i>i</i> <b>0</b>   |
| $\omega_{32} a''$ | 109 <i>i</i> <b>38</b> |
| $\omega_{33} a''$ | 175 <i>i</i> <b>0</b>  |

## Hexamer Structures: F<sup>-</sup>-(H<sub>2</sub>S)<sub>5</sub>

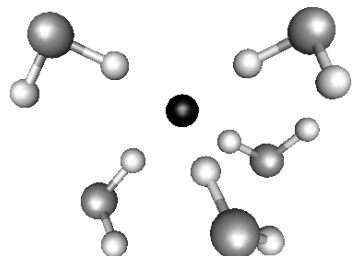

*C*<sub>1</sub> symmetry, minimum

|             | <i>r</i> (F-H <sub>b</sub> ) | <i>r</i> (S-H <sub>b</sub> ) | <i>r</i> (S-H <sub>t</sub> ) | ∠(F-H <sub>b</sub> -S) | ∠(H-S-H) | ∠(H <sub>b</sub> -F-H <sub>b</sub> ) | <i>zpe</i> | <i>E</i> <sub>MP2</sub> | <i>E</i> <sub><i>e</i>/BSSE</sub> | Δ <i>E</i> <sub><i>e</i>/BSSE</sub> | Δ <i>E</i> <sub><i>e</i>/BSSE/Corr</sub> |
|-------------|------------------------------|------------------------------|------------------------------|------------------------|----------|--------------------------------------|------------|-------------------------|-----------------------------------|-------------------------------------|------------------------------------------|
| <i>pvdz</i> | 1.732 <i>rb</i>              | 1.383                        | 1.352                        | 171.5                  | 91.2     | 88.4 <i>rb-rm</i>                    | 54.4       | -2094.065047            | -2094.052606                      | 0.0                                 | 0.0                                      |
|             | 1.790 <i>rm</i>              | 1.376                        | 1.352                        | 169.6                  | 91.2     | 86.4 <i>rm-rt</i>                    |            |                         |                                   |                                     |                                          |
|             | 1.747 <i>rt</i>              | 1.380                        | 1.351                        | 170.7                  | 91.4     | 106.4 <i>rt-lt</i>                   |            |                         |                                   |                                     |                                          |
|             | 1.752 <i>lt</i>              | 1.379                        | 1.351                        | 171.6                  | 91.6     | 85.4 <i>lt-lb</i>                    |            |                         |                                   |                                     |                                          |
|             | 1.752 <i>lb</i>              | 1.379                        | 1.351                        | 172.3                  | 91.4     | 87.1 <i>lb-rb</i>                    |            |                         |                                   |                                     |                                          |

*rb*=right bottom, *rm*=right middle, *rt*=right top, *lt*=left top, *lb*=left bottom.

|                         | <i>MP2/aug-cc-pvdz</i> |
|-------------------------|------------------------|
| <b>ω<sub>1</sub> a</b>  | 2751 <b>1</b>          |
| <b>ω<sub>2</sub> a</b>  | 2749 <b>1</b>          |
| <b>ω<sub>3</sub> a</b>  | 2747 <b>2</b>          |
| <b>ω<sub>4</sub> a</b>  | 2744 <b>4</b>          |
| <b>ω<sub>5</sub> a</b>  | 2742 <b>1</b>          |
| <b>ω<sub>6</sub> a</b>  | 2544 <b>50</b>         |
| <b>ω<sub>7</sub> a</b>  | 2396 <b>1091</b>       |
| <b>ω<sub>8</sub> a</b>  | 2362 <b>658</b>        |
| <b>ω<sub>9</sub> a</b>  | 2349 <b>1540</b>       |
| <b>ω<sub>10</sub> a</b> | 2313 <b>561</b>        |
| <b>ω<sub>11</sub> a</b> | 1217 <b>9</b>          |
| <b>ω<sub>12</sub> a</b> | 1207 <b>9</b>          |
| <b>ω<sub>13</sub> a</b> | 1205 <b>5</b>          |
| <b>ω<sub>14</sub> a</b> | 1202 <b>4</b>          |
| <b>ω<sub>15</sub> a</b> | 1198 <b>15</b>         |
| <b>ω<sub>16</sub> a</b> | 612 <b>29</b>          |
| <b>ω<sub>17</sub> a</b> | 576 <b>38</b>          |
| <b>ω<sub>18</sub> a</b> | 570 <b>9</b>           |
| <b>ω<sub>19</sub> a</b> | 544 <b>11</b>          |
| <b>ω<sub>20</sub> a</b> | 528 <b>12</b>          |
| <b>ω<sub>21</sub> a</b> | 314 <b>28</b>          |
| <b>ω<sub>22</sub> a</b> | 310 <b>33</b>          |
| <b>ω<sub>23</sub> a</b> | 294 <b>17</b>          |
| <b>ω<sub>24</sub> a</b> | 289 <b>5</b>           |
| <b>ω<sub>25</sub> a</b> | 287 <b>7</b>           |
| <b>ω<sub>26</sub> a</b> | 283 <b>&lt;1</b>       |
| <b>ω<sub>27</sub> a</b> | 221 <b>7</b>           |
| <b>ω<sub>28</sub> a</b> | 204 <b>119</b>         |
| <b>ω<sub>29</sub> a</b> | 187 <b>24</b>          |
| <b>ω<sub>30</sub> a</b> | 186 <b>79</b>          |
| <b>ω<sub>31</sub> a</b> | 167 <b>5</b>           |
| <b>ω<sub>32</sub> a</b> | 154 <b>45</b>          |
| <b>ω<sub>33</sub> a</b> | 135 <b>4</b>           |
| <b>ω<sub>34</sub> a</b> | 119 <b>11</b>          |
| <b>ω<sub>35</sub> a</b> | 90 <b>&lt;1</b>        |
| <b>ω<sub>36</sub> a</b> | 58 <b>1</b>            |
| <b>ω<sub>37</sub> a</b> | 50 <b>1</b>            |
| <b>ω<sub>38</sub> a</b> | 49 <b>&lt;1</b>        |
| <b>ω<sub>39</sub> a</b> | 43 <b>&lt;1</b>        |
| <b>ω<sub>40</sub> a</b> | 36 <b>1</b>            |
| <b>ω<sub>41</sub> a</b> | 21 <b>1</b>            |
| <b>ω<sub>42</sub> a</b> | 11 <b>&lt;1</b>        |

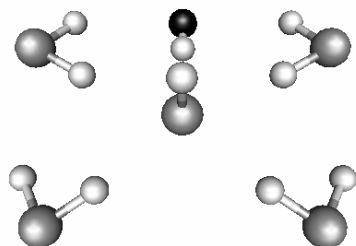

$C_s$  symmetry, minimum

HF-SH<sup>-</sup> unit

|             | $r(F-H_b)$ | $r(S-H_b)$ | $r(S-H_d)$ | $\theta(F-H_b-S)$ | $\theta(H-S-H)$ | $zpe$ | $E_{MP2}$    | $E_{e/BSSE}$ | $\Delta E_{e/BSSE}$ | $\Delta E_{e/BSSE/Corr}$ |
|-------------|------------|------------|------------|-------------------|-----------------|-------|--------------|--------------|---------------------|--------------------------|
| <i>pvdz</i> | 0.971      | 2.031      | 1.353      | 178.1             | 98.8            | 55.0  | -2094.065521 | -2094.053442 | 0.5                 | 0.1                      |

SH<sub>2</sub> units bound to FH..SH<sup>-</sup> core

|             | $r(H...F)$ | $r(H...S)$ | $r(S-H_F)$ | $r(S-H_S)$ | $\theta(H-S-H)$ |
|-------------|------------|------------|------------|------------|-----------------|
| <i>pvdz</i> | 2.687      | 2.408      | 1.351      | 1.372      | 90.9            |

Bottom SH<sub>2</sub> units bound to SH<sup>-</sup> and SH<sub>2</sub>

|             | $r(H...SH)$ | $r(H...SH_2)$ | $r(S-H_S)$ | $r(S-H_{SH_2})$ | $\theta(H-S-H)$ |
|-------------|-------------|---------------|------------|-----------------|-----------------|
| <i>pvdz</i> | 2.422       | 2.973         | 1.371      | 1.351           | 91.7            |

|                   | <i>MP2/aug-cc-pvdz</i> |
|-------------------|------------------------|
| $\omega_1 a'$     | 3071 <b>1687</b>       |
| $\omega_2 a'$     | 2752 <b>1</b>          |
| $\omega_3 a'$     | 2747 <b>4</b>          |
| $\omega_4 a'$     | 2729 <b>5</b>          |
| $\omega_5 a'$     | 2525 <b>153</b>        |
| $\omega_6 a'$     | 2473 <b>654</b>        |
| $\omega_7 a'$     | 1201 <b>6</b>          |
| $\omega_8 a'$     | 1183 <b>7</b>          |
| $\omega_9 a'$     | 870 <b>21</b>          |
| $\omega_{10} a'$  | 490 <b>6</b>           |
| $\omega_{11} a'$  | 467 <b>9</b>           |
| $\omega_{12} a'$  | 322 <b>5</b>           |
| $\omega_{13} a'$  | 271 <b>16</b>          |
| $\omega_{14} a'$  | 253 <b>3</b>           |
| $\omega_{15} a'$  | 228 <b>32</b>          |
| $\omega_{16} a'$  | 220 <b>13</b>          |
| $\omega_{17} a'$  | 163 <b>4</b>           |
| $\omega_{18} a'$  | 104 <b>11</b>          |
| $\omega_{19} a'$  | 92 <b>1</b>            |
| $\omega_{20} a'$  | 53 <1                  |
| $\omega_{21} a'$  | 29 <1                  |
| $\omega_{22} a'$  | 26 <b>1</b>            |
| $\omega_{23} a'$  | 17 <b>1</b>            |
| $\omega_{24} a''$ | 2752 <b>2</b>          |
| $\omega_{25} a''$ | 2747 <b>1</b>          |
| $\omega_{26} a''$ | 2493 <b>1435</b>       |
| $\omega_{27} a''$ | 2469 <b>911</b>        |
| $\omega_{28} a''$ | 1199 <1                |
| $\omega_{29} a''$ | 1183 <b>20</b>         |
| $\omega_{30} a''$ | 836 <b>66</b>          |
| $\omega_{31} a''$ | 513 <b>1</b>           |
| $\omega_{32} a''$ | 461 <b>1</b>           |
| $\omega_{33} a''$ | 284 <b>1</b>           |
| $\omega_{34} a''$ | 258 <b>14</b>          |
| $\omega_{35} a''$ | 244 <b>2</b>           |
| $\omega_{36} a''$ | 204 <b>9</b>           |
| $\omega_{37} a''$ | 161 <b>7</b>           |
| $\omega_{38} a''$ | 150 <b>57</b>          |
| $\omega_{39} a''$ | 83 <1                  |
| $\omega_{40} a''$ | 60 <b>0</b>            |
| $\omega_{41} a''$ | 54 <b>1</b>            |
| $\omega_{42} a''$ | 11 <1                  |



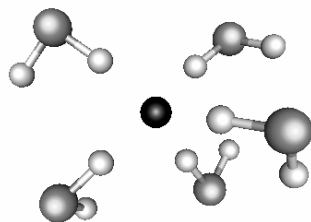

$C_1$  symmetry, minimum

|             | $r(F-H_b)$      | $r(S-H_b)$ | $r(S-H_l)$ | $\theta(F-H_b-S)$ | $\theta(H-S-H)$ | $\theta(H_b-F-H_b)$ | $zpe$ | $E_{MP2}$    | $E_{e/BSSE}$ | $\Delta E_{e/BSSE}$ | $\Delta E_{e/BSSE/Corr}$ |
|-------------|-----------------|------------|------------|-------------------|-----------------|---------------------|-------|--------------|--------------|---------------------|--------------------------|
| <i>pvdz</i> | 1.785 <i>tr</i> | 1.376      | 1.352      | 169.6             | 91.0            | 88.1 <i>tr-mr</i>   | 54.5  | -2094.064488 | -2094.052168 | 0.3                 | 0.4                      |
|             | 1.732 <i>mr</i> | 1.382      | 1.351      | 170.2             | 91.4            | 87.8 <i>mr-br</i>   |       |              |              |                     |                          |
|             | 1.763 <i>br</i> | 1.378      | 1.352      | 174.7             | 91.4            | 82.2 <i>br-bl</i>   |       |              |              |                     |                          |
|             | 1.722 <i>bl</i> | 1.383      | 1.351      | 174.3             | 92.1            | 85.3 <i>bl-tl</i>   |       |              |              |                     |                          |
|             | 1.763 <i>tl</i> | 1.377      | 1.351      | 172.2             | 91.5            | 86.6 <i>tl-tr</i>   |       |              |              |                     |                          |

|                 | <i>MP2/aug-cc-pvdz</i> |
|-----------------|------------------------|
| $\omega_1 a$    | 2755 <1                |
| $\omega_2 a$    | 2750 1                 |
| $\omega_3 a$    | 2747 2                 |
| $\omega_4 a$    | 2745 2                 |
| $\omega_5 a$    | 2743 2                 |
| $\omega_6 a$    | 2546 47                |
| $\omega_7 a$    | 2395 911               |
| $\omega_8 a$    | 2377 1271              |
| $\omega_9 a$    | 2333 618               |
| $\omega_{10} a$ | 2311 1195              |
| $\omega_{11} a$ | 1126 1                 |
| $\omega_{12} a$ | 1217 9                 |
| $\omega_{13} a$ | 1209 15                |
| $\omega_{14} a$ | 1201 3                 |
| $\omega_{15} a$ | 1199 10                |
| $\omega_{16} a$ | 614 32                 |
| $\omega_{17} a$ | 580 13                 |
| $\omega_{18} a$ | 570 16                 |
| $\omega_{19} a$ | 559 14                 |
| $\omega_{20} a$ | 536 13                 |
| $\omega_{21} a$ | 318 18                 |
| $\omega_{22} a$ | 317 25                 |
| $\omega_{23} a$ | 305 14                 |
| $\omega_{24} a$ | 302 20                 |
| $\omega_{25} a$ | 284 15                 |
| $\omega_{26} a$ | 277 1                  |
| $\omega_{27} a$ | 211 79                 |
| $\omega_{28} a$ | 203 75                 |
| $\omega_{29} a$ | 188 9                  |
| $\omega_{30} a$ | 178 89                 |
| $\omega_{31} a$ | 164 9                  |
| $\omega_{32} a$ | 154 27                 |
| $\omega_{33} a$ | 126 15                 |
| $\omega_{34} a$ | 110 3                  |
| $\omega_{35} a$ | 84 <1                  |
| $\omega_{36} a$ | 60 1                   |
| $\omega_{37} a$ | 51 1                   |
| $\omega_{38} a$ | 46 <1                  |
| $\omega_{39} a$ | 42 <1                  |
| $\omega_{40} a$ | 34 1                   |
| $\omega_{41} a$ | 20 <1                  |
| $\omega_{42} a$ | 10 <1                  |

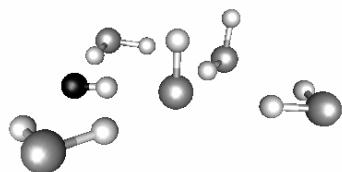

$C_1$  symmetry, minimum

HF-SH unit

|             | $r(F-H_b)$ | $r(S-H_b)$ | $r(S-H_f)$ | $\theta(F-H_b-S)$ | $\theta(H-S-H)$ | $zpe$ | $E_{MP2}$    | $E_{e/BSSE}$ | $\Delta E_{e/BSSE}$ | $\Delta E_{e/BSSE/Corr}$ |
|-------------|------------|------------|------------|-------------------|-----------------|-------|--------------|--------------|---------------------|--------------------------|
| <i>pvdz</i> | 0.983      | 1.979      | 1.353      | 178.2             | 95.1            | 54.8  | -2094.064185 | -2094.052358 | 0.2                 | 0.6                      |

SH<sub>2</sub> units bound to Fluorine

|             | $r(H...F)$      | $r(H...S)$ | $r(S-H_F)$ | $r(S-H_S)$ | $\theta(H-S-H)$ |
|-------------|-----------------|------------|------------|------------|-----------------|
| <i>pvdz</i> | 2.567 <i>f</i>  | 2.449      | 1.351      | 1.369      | 90.8            |
|             | 2.077 <i>ba</i> | 2.696      | 1.356      | 1.355      | 92.3            |

SH<sub>2</sub> unit bound to SH only

|             | $r(H...S)$ | $r(S-H_S)$ | $r(S-H_f)$ | $\theta(H-S-H)$ |
|-------------|------------|------------|------------|-----------------|
| <i>pvdz</i> | 2.271      | 1.391      | 1.351      | 92.2            |

SH<sub>2</sub> unit bound to SH and SH<sub>2</sub>

|             | $r(H...S)$ | $r(H...SH_2)$ | $r(S-H_S)$ | $r(S-H_{SH_2})$ | $\theta(H-S-H)$ |
|-------------|------------|---------------|------------|-----------------|-----------------|
| <i>pvdz</i> | 2.428      | 2.911         | 1.369      | 1.352           | 91.1            |

*f*=front, *ba*=back

|                 | <i>MP2/aug-cc-pvdz</i> |
|-----------------|------------------------|
| $\omega_1 a$    | 2864 <b>2183</b>       |
| $\omega_2 a$    | 2756 <b>1</b>          |
| $\omega_3 a$    | 2754 <b>10</b>         |
| $\omega_4 a$    | 2737 <b>14</b>         |
| $\omega_5 a$    | 2728 <b>10</b>         |
| $\omega_6 a$    | 2700 <b>30</b>         |
| $\omega_7 a$    | 2684 <b>343</b>        |
| $\omega_8 a$    | 2525 <b>321</b>        |
| $\omega_9 a$    | 2513 <b>1231</b>       |
| $\omega_{10} a$ | 2242 <b>1636</b>       |
| $\omega_{11} a$ | 1209 <b>2</b>          |
| $\omega_{12} a$ | 1203 <b>6</b>          |
| $\omega_{13} a$ | 1184 <b>2</b>          |
| $\omega_{14} a$ | 1180 <b>32</b>         |
| $\omega_{15} a$ | 917 <b>25</b>          |
| $\omega_{16} a$ | 872 <b>72</b>          |
| $\omega_{17} a$ | 551 <b>10</b>          |
| $\omega_{18} a$ | 484 <b>3</b>           |
| $\omega_{19} a$ | 462 <b>6</b>           |
| $\omega_{20} a$ | 372 <b>10</b>          |
| $\omega_{21} a$ | 346 <b>13</b>          |
| $\omega_{22} a$ | 330 <b>1</b>           |
| $\omega_{23} a$ | 318 <b>8</b>           |
| $\omega_{24} a$ | 267 <b>4</b>           |
| $\omega_{25} a$ | 245 <b>13</b>          |
| $\omega_{26} a$ | 241 <b>23</b>          |
| $\omega_{27} a$ | 235 <b>8</b>           |
| $\omega_{28} a$ | 226 <b>3</b>           |
| $\omega_{29} a$ | 212 <b>21</b>          |
| $\omega_{30} a$ | 197 <b>9</b>           |
| $\omega_{31} a$ | 143 <b>63</b>          |
| $\omega_{32} a$ | 120 <b>16</b>          |
| $\omega_{33} a$ | 98 <b>6</b>            |
| $\omega_{34} a$ | 91 <b>1</b>            |
| $\omega_{35} a$ | 90 <b>1</b>            |
| $\omega_{36} a$ | 80 <b>3</b>            |
| $\omega_{37} a$ | 53 < <b>1</b>          |
| $\omega_{38} a$ | 40 < <b>1</b>          |
| $\omega_{39} a$ | 24 < <b>1</b>          |
| $\omega_{40} a$ | 18 <b>1</b>            |
| $\omega_{41} a$ | 15 < <b>1</b>          |
| $\omega_{42} a$ | 7 < <b>1</b>           |

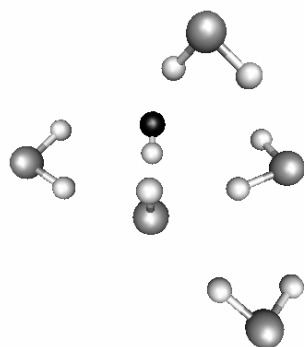

$C_1$  symmetry, minimum

HF-SH<sup>-</sup> unit

|             | $r(F-H_b)$ | $r(S-H_b)$ | $r(S-H_l)$ | $\theta(F-H_b-S)$ | $\theta(H-S-H)$ | $zpe$ | $E_{MP2}$    | $E_{e/BSSE}$ | $\Delta E_{e/BSSE}$ | $\Delta E_{e/BSSE/Corr}$ |
|-------------|------------|------------|------------|-------------------|-----------------|-------|--------------|--------------|---------------------|--------------------------|
| <i>pvdz</i> | 0.988      | 1.955      | 1.354      | 177.7             | 94.0            | 54.8  | -2094.064547 | -2094.052062 | 0.3                 | 0.7                      |

SH<sub>2</sub> units bound to FH..SH<sup>-</sup> core

|             | $r(H...F)$     | $r(H...S)$ | $r(S-H_F)$ | $r(S-H_S)$ | $\theta(H-S-H)$ |
|-------------|----------------|------------|------------|------------|-----------------|
| <i>pvdz</i> | 3.055 <i>r</i> | 2.295      | 1.351      | 1.385      | 91.5            |
|             | 2.594 <i>l</i> | 2.436      | 1.351      | 1.370      | 90.8            |

Top SH<sub>2</sub>, bound to F and SH<sub>2</sub>

|             | $r(H...F)$ | $r(H...SH_2)$ | $r(S-H_F)$ | $r(S-H_{SH_2})$ | $\theta(H-S-H)$ |
|-------------|------------|---------------|------------|-----------------|-----------------|
| <i>pvdz</i> | 2.126      | 2.762         | 1.355      | 1.354           | 91.3            |

Bottom SH<sub>2</sub> bound to SH<sup>-</sup> and SH<sub>2</sub>

|             | $r(H...S)$ | $r(H...SH_2)$ | $r(S-H_S)$ | $r(S-H_{SH_2})$ | $\theta(H-S-H)$ |
|-------------|------------|---------------|------------|-----------------|-----------------|
| <i>pvdz</i> | 2.397      | 2.963         | 1.372      | 1.351           | 91.7            |

|                 | <i>MP2/aug-cc-pvdz</i> |
|-----------------|------------------------|
| $\omega_1 a$    | 2776 <b>1313</b>       |
| $\omega_2 a$    | 2753 <b>135</b>        |
| $\omega_3 a$    | 2749 <b>14</b>         |
| $\omega_4 a$    | 2747 <b>29</b>         |
| $\omega_5 a$    | 2724 <b>8</b>          |
| $\omega_6 a$    | 2712 <b>54</b>         |
| $\omega_7 a$    | 2689 <b>563</b>        |
| $\omega_8 a$    | 2507 <b>332</b>        |
| $\omega_9 a$    | 2474 <b>1468</b>       |
| $\omega_{10} a$ | 2308 <b>1087</b>       |
| $\omega_{11} a$ | 1200 <b>6</b>          |
| $\omega_{12} a$ | 1198 <b>2</b>          |
| $\omega_{13} a$ | 1186 <b>22</b>         |
| $\omega_{14} a$ | 1183 <b>6</b>          |
| $\omega_{15} a$ | 965 <b>37</b>          |
| $\omega_{16} a$ | 880 <b>54</b>          |
| $\omega_{17} a$ | 570 <b>6</b>           |
| $\omega_{18} a$ | 505 <b>3</b>           |
| $\omega_{19} a$ | 463 <b>6</b>           |
| $\omega_{20} a$ | 350 <b>10</b>          |
| $\omega_{21} a$ | 347 <b>10</b>          |
| $\omega_{22} a$ | 302 <b>8</b>           |
| $\omega_{23} a$ | 287 <b>8</b>           |
| $\omega_{24} a$ | 270 <b>&lt;1</b>       |
| $\omega_{25} a$ | 260 <b>22</b>          |
| $\omega_{26} a$ | 250 <b>23</b>          |
| $\omega_{27} a$ | 229 <b>7</b>           |
| $\omega_{28} a$ | 223 <b>13</b>          |
| $\omega_{29} a$ | 197 <b>13</b>          |
| $\omega_{30} a$ | 190 <b>10</b>          |
| $\omega_{31} a$ | 153 <b>5</b>           |
| $\omega_{32} a$ | 150 <b>63</b>          |
| $\omega_{33} a$ | 114 <b>9</b>           |
| $\omega_{34} a$ | 95 <b>3</b>            |
| $\omega_{35} a$ | 92 <b>2</b>            |
| $\omega_{36} a$ | 79 <b>&lt;1</b>        |
| $\omega_{37} a$ | 55 <b>&lt;1</b>        |
| $\omega_{38} a$ | 51 <b>1</b>            |
| $\omega_{39} a$ | 30 <b>&lt;1</b>        |
| $\omega_{40} a$ | 22 <b>1</b>            |
| $\omega_{41} a$ | 15 <b>&lt;1</b>        |
| $\omega_{42} a$ | 12 <b>&lt;1</b>        |

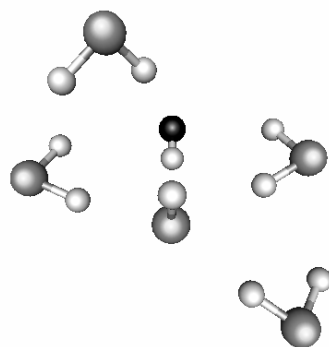

$C_1$  symmetry, minimum

HF-SH<sup>-</sup> unit

|             | $r(F-H_b)$ | $r(S-H_b)$ | $r(S-H_l)$ | $\theta(F-H_b-S)$ | $\theta(H-S-H)$ | $zpe$ | $E_{MP2}$    | $E_{e/BSSE}$ | $\Delta E_{e/BSSE}$ | $\Delta E_{e/BSSE/Corr}$ |
|-------------|------------|------------|------------|-------------------|-----------------|-------|--------------|--------------|---------------------|--------------------------|
| <i>pvdz</i> | 0.988      | 1.954      | 1.354      | 177.6             | 94.3            | 54.9  | -2094.064435 | -2094.051924 | 0.4                 | 0.9                      |

SH<sub>2</sub> units bound to FH..SH<sup>-</sup> core

|             | $r(H...F)$     | $r(H...S)$ | $r(S-H_F)$  | $r(S-H_S)$ | $\theta(H-S-H)$ |
|-------------|----------------|------------|-------------|------------|-----------------|
| <i>pvdz</i> | 2.664 <i>r</i> | 2.400      | 1.351 1.351 | 1.372      | 90.9            |
|             | 3.007 <i>l</i> | 2.310      |             | 1.380      | 91.5            |

Top SH<sub>2</sub>, bound to F and SH<sub>2</sub>

|             | $r(H...F)$ | $r(H...SH_2)$ | $r(S-H_F)$ | $r(S-H_{SH_2})$ | $\theta(H-S-H)$ |
|-------------|------------|---------------|------------|-----------------|-----------------|
| <i>pvdz</i> | 2.138      | 2.780         | 1.355      | 1.354           | 91.4            |

Bottom SH<sub>2</sub> bound to SH<sup>-</sup> and SH<sub>2</sub>

|             | $r(H...S)$ | $r(H...SH_2)$ | $r(S-H_S)$ | $r(S-H_{SH_2})$ | $\theta(H-S-H)$ |
|-------------|------------|---------------|------------|-----------------|-----------------|
| <i>pvdz</i> | 2.403      | 2.977         | 1.372      | 1.351           | 91.7            |

|                 | <i>MP2/aug-cc-pvdz</i> |
|-----------------|------------------------|
| $\omega_1 a$    | 2773 1271              |
| $\omega_2 a$    | 2753 21                |
| $\omega_3 a$    | 2750 88                |
| $\omega_4 a$    | 2747 16                |
| $\omega_5 a$    | 2724 8                 |
| $\omega_6 a$    | 2714 68                |
| $\omega_7 a$    | 2690 580               |
| $\omega_8 a$    | 2489 1104              |
| $\omega_9 a$    | 2454 312               |
| $\omega_{10} a$ | 2367 1568              |
| $\omega_{11} a$ | 1199 <1                |
| $\omega_{12} a$ | 1199 8                 |
| $\omega_{13} a$ | 1189 8                 |
| $\omega_{14} a$ | 1182 11                |
| $\omega_{15} a$ | 968 30                 |
| $\omega_{16} a$ | 883 55                 |
| $\omega_{17} a$ | 559 2                  |
| $\omega_{18} a$ | 494 9                  |
| $\omega_{19} a$ | 476 5                  |
| $\omega_{20} a$ | 347 11                 |
| $\omega_{21} a$ | 345 11                 |
| $\omega_{22} a$ | 291 7                  |
| $\omega_{23} a$ | 280 3                  |
| $\omega_{24} a$ | 271 18                 |
| $\omega_{25} a$ | 263 3                  |
| $\omega_{26} a$ | 257 30                 |
| $\omega_{27} a$ | 247 8                  |
| $\omega_{28} a$ | 223 11                 |
| $\omega_{29} a$ | 211 6                  |
| $\omega_{30} a$ | 163 19                 |
| $\omega_{31} a$ | 161 5                  |
| $\omega_{32} a$ | 148 63                 |
| $\omega_{33} a$ | 110 5                  |
| $\omega_{34} a$ | 94 5                   |
| $\omega_{35} a$ | 94 <1                  |
| $\omega_{36} a$ | 72 1                   |
| $\omega_{37} a$ | 57 <1                  |
| $\omega_{38} a$ | 53 <1                  |
| $\omega_{39} a$ | 32 <1                  |
| $\omega_{40} a$ | 22 1                   |
| $\omega_{41} a$ | 16 <1                  |
| $\omega_{42} a$ | 11 <1                  |

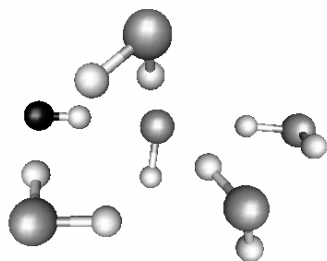

$C_1$  symmetry, minimum

HF-SH<sup>-</sup> unit

|             | $r(F-H_b)$ | $r(S-H_b)$ | $r(S-H_f)$ | $\theta(F-H_b-S)$ | $\theta(H-S-H)$ | $zpe$ | $E_{MP2}$    | $E_{e/BSSE}$ | $\Delta E_{e/BSSE}$ | $\Delta E_{e/BSSE/Corr}$ |
|-------------|------------|------------|------------|-------------------|-----------------|-------|--------------|--------------|---------------------|--------------------------|
| <i>pvdz</i> | 0.977      | 2.000      | 1.354      | 174.0             | 91.1            | 55.1  | -2094.064374 | -2094.051229 | 0.9                 | 1.6                      |

Top SH<sub>2</sub>, bound to SH<sup>-</sup> and SH<sub>2</sub>

|             | $r(H...S)$ | $r(H...SH_2)$ | $r(S-H_{SH})$ | $r(S-H_{SH_2})$ | $\theta(H-S-H)$ |
|-------------|------------|---------------|---------------|-----------------|-----------------|
| <i>pvdz</i> | 2.458      | 2.881         | 1.366         | 1.352           | 91.6            |

Front SH<sub>2</sub>, bound to F and SH<sub>2</sub>

|             | $r(H...F)$ | $r(H...SH_2)$ | $r(S-H_F)$ | $r(S-H_{SH_2})$ | $\theta(H-S-H)$ |
|-------------|------------|---------------|------------|-----------------|-----------------|
| <i>pvdz</i> | 2.098      | 2.742         | 1.357      | 1.355           | 93.0            |

Front SH<sub>2</sub> bound to SH<sup>-</sup>

|             | $r(H...S)$ | $r(S-H_s)$ | $r(S-H_f)$ | $\theta(H-S-H)$ |
|-------------|------------|------------|------------|-----------------|
| <i>pvdz</i> | 2.304      | 1.385      | 1.352      | 91.9            |

Right SH<sub>2</sub> bound to SH<sup>-</sup>

|             | $r(H...S)$ | $r(S-H_s)$ | $r(S-H_f)$ | $\theta(H-S-H)$ |
|-------------|------------|------------|------------|-----------------|
| <i>pvdz</i> | 2.407      | 1.371      | 1.352      | 91.2            |

|                 | <i>MP2/aug-cc-pvdz</i> |
|-----------------|------------------------|
| $\omega_1 a$    | 2965 <b>2258</b>       |
| $\omega_2 a$    | 2743 <b>4</b>          |
| $\omega_3 a$    | 2738 <b>10</b>         |
| $\omega_4 a$    | 2733 <b>22</b>         |
| $\omega_5 a$    | 2721 <b>13</b>         |
| $\omega_6 a$    | 2704 <b>42</b>         |
| $\omega_7 a$    | 2681 <b>169</b>        |
| $\omega_8 a$    | 2562 <b>383</b>        |
| $\omega_9 a$    | 2496 <b>922</b>        |
| $\omega_{10} a$ | 2312 <b>867</b>        |
| $\omega_{11} a$ | 1201 <b>7</b>          |
| $\omega_{12} a$ | 1199 <b>1</b>          |
| $\omega_{13} a$ | 1190 <b>2</b>          |
| $\omega_{14} a$ | 1183 <b>12</b>         |
| $\omega_{15} a$ | 905 <b>46</b>          |
| $\omega_{16} a$ | 827 <b>58</b>          |
| $\omega_{17} a$ | 538 <b>7</b>           |
| $\omega_{18} a$ | 490 <b>5</b>           |
| $\omega_{19} a$ | 421 <b>3</b>           |
| $\omega_{20} a$ | 388 <b>4</b>           |
| $\omega_{21} a$ | 364 <b>16</b>          |
| $\omega_{22} a$ | 353 <b>21</b>          |
| $\omega_{23} a$ | 306 <b>5</b>           |
| $\omega_{24} a$ | 263 <b>1</b>           |
| $\omega_{25} a$ | 249 <b>17</b>          |
| $\omega_{26} a$ | 238 <b>11</b>          |
| $\omega_{27} a$ | 232 <b>18</b>          |
| $\omega_{28} a$ | 223 <b>2</b>           |
| $\omega_{29} a$ | 221 <b>27</b>          |
| $\omega_{30} a$ | 189 <b>4</b>           |
| $\omega_{31} a$ | 159 <b>12</b>          |
| $\omega_{32} a$ | 137 <b>28</b>          |
| $\omega_{33} a$ | 111 <b>10</b>          |
| $\omega_{34} a$ | 99 <b>4</b>            |
| $\omega_{35} a$ | 91 <b>5</b>            |
| $\omega_{36} a$ | 77 <b>1</b>            |
| $\omega_{37} a$ | 65 <b>&lt;1</b>        |
| $\omega_{38} a$ | 55 <b>1</b>            |
| $\omega_{39} a$ | 50 <b>2</b>            |
| $\omega_{40} a$ | 33 <b>&lt;1</b>        |
| $\omega_{41} a$ | 24 <b>&lt;1</b>        |
| $\omega_{42} a$ | 8 <b>&lt;1</b>         |

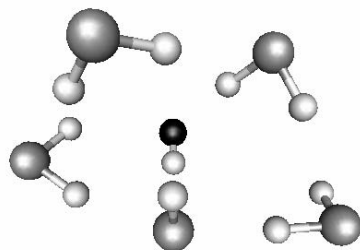

$C_1$  symmetry, minimum

HF-SH<sup>-</sup> unit

|             | $r(F-H_b)$ | $r(S-H_b)$ | $r(S-H_l)$ | $\theta(F-H_b-S)$ | $\theta(H-S-H)$ | $zpe$ | $E_{MP2}$    | $E_{e/BSSE}$ | $\Delta E_{e/BSSE}$ | $\Delta E_{e/BSSE/Corr}$ |
|-------------|------------|------------|------------|-------------------|-----------------|-------|--------------|--------------|---------------------|--------------------------|
| <i>pvdz</i> | 0.997      | 1.927      | 1.354      | 177.5             | 93.9            | 54.8  | -2094.063572 | -2094.050227 | 1.5                 | 1.9                      |

Bottom two SH<sub>2</sub> units bound to FH...SH<sup>-</sup> core

|             | $r(H...F)$     | $r(H...S^{\ominus})$ | $r(S-H_F)$ | $r(S-H_S)$ | $\theta(H-S-H)$ |
|-------------|----------------|----------------------|------------|------------|-----------------|
| <i>pvdz</i> | 4.001 <i>r</i> | 2.247                | 1.351      | 1.391      | 92.4            |
|             | 2.597 <i>l</i> | 2.329                | 1.352      | 1.379      | 90.7            |

Top right SH<sub>2</sub> unit bound to F and SH<sub>2</sub>

|             | $r(H...F)$ | $r(H...SH_2)$ | $r(S-H_F)$ | $r(S-H_{SH_2})$ | $\theta(H-S-H)$ |
|-------------|------------|---------------|------------|-----------------|-----------------|
| <i>pvdz</i> | 2.031      | 2.720         | 1.358      | 1.355           | 92.1            |

Top left SH<sub>2</sub> unit bound to two SH<sub>2</sub>'s

|             | $r(H...SH_2)$  | $r(S-H_{SH_2\theta})$ | $r(S-H_{SH_2\theta})$ | $\theta(H-S-H)$ |
|-------------|----------------|-----------------------|-----------------------|-----------------|
| <i>pvdz</i> | 2.707 <i>t</i> | 1.355                 | 1.356                 | 93.2            |
|             | 2.696 <i>l</i> |                       |                       |                 |

*t*=top, *l*=left

|                 | <i>MP2/aug-cc-pvdz</i> |
|-----------------|------------------------|
| $\omega_1 a$    | 2754 <b>1</b>          |
| $\omega_2 a$    | 2749 <b>23</b>         |
| $\omega_3 a$    | 2719 <b>6</b>          |
| $\omega_4 a$    | 2705 <b>136</b>        |
| $\omega_5 a$    | 2701 <b>363</b>        |
| $\omega_6 a$    | 2685 <b>139</b>        |
| $\omega_7 a$    | 2680 <b>151</b>        |
| $\omega_8 a$    | 2570 <b>1716</b>       |
| $\omega_9 a$    | 2380 <b>632</b>        |
| $\omega_{10} a$ | 2233 <b>2169</b>       |
| $\omega_{11} a$ | 1206 <b>1</b>          |
| $\omega_{12} a$ | 1191 <1                |
| $\omega_{13} a$ | 1190 <b>9</b>          |
| $\omega_{14} a$ | 1179 <b>20</b>         |
| $\omega_{15} a$ | 998 <b>36</b>          |
| $\omega_{16} a$ | 913 <b>48</b>          |
| $\omega_{17} a$ | 596 <b>8</b>           |
| $\omega_{18} a$ | 522 <b>8</b>           |
| $\omega_{19} a$ | 408 <b>16</b>          |
| $\omega_{20} a$ | 376 <b>8</b>           |
| $\omega_{21} a$ | 362 <b>13</b>          |
| $\omega_{22} a$ | 336 <b>6</b>           |
| $\omega_{23} a$ | 308 <b>11</b>          |
| $\omega_{24} a$ | 280 <b>9</b>           |
| $\omega_{25} a$ | 268 <b>9</b>           |
| $\omega_{26} a$ | 259 <b>19</b>          |
| $\omega_{27} a$ | 252 <b>1</b>           |
| $\omega_{28} a$ | 241 <b>30</b>          |
| $\omega_{29} a$ | 218 <b>13</b>          |
| $\omega_{30} a$ | 195 <b>5</b>           |
| $\omega_{31} a$ | 151 <b>79</b>          |
| $\omega_{32} a$ | 133 <b>25</b>          |
| $\omega_{33} a$ | 120 <b>1</b>           |
| $\omega_{34} a$ | 100 <b>2</b>           |
| $\omega_{35} a$ | 86 <b>1</b>            |
| $\omega_{36} a$ | 78 <b>2</b>            |
| $\omega_{37} a$ | 70 <b>2</b>            |
| $\omega_{38} a$ | 51 <1                  |
| $\omega_{39} a$ | 44 <1                  |
| $\omega_{40} a$ | 25 <1                  |
| $\omega_{41} a$ | 16 <1                  |
| $\omega_{42} a$ | 14 <1                  |
